# Supplementary material
Source: PubMed Central journal article supplement (PMC7144094)
Supplement: btz740_supplementary_data.pdf [file btz740_supplementary_data.pdf]

## Supporting Information

### Table of Content

#### Supporting Texts

**Text S1.** The EvoEF energy function.

**Text S2.** The EvoEF2 energy function.

**Text S3.** Optimization of weights and reference energies in EvoEF2.

**Text S4.** Protein design procedure.

#### Supporting Tables

**Table S1.** Native sequence recapitulation results from designing 148 test set monomers using EvoEF and EvoEF2. ‘#nat’ is the number of native residues, ‘#des’ is the number of designed residues and ‘#id’ is the number of residues with recapitulated identities (the same designations are used in Table S2 and Table S7-9).

**Table S2.** Native sequence recapitulation results from designing 222 training set monomers using EvoEF and EvoEF2.

**Table S3.** Summary of the weights for each EvoEF and EvoEF2 energy term. The extended terms in EvoEF2 are highlighted in bold.

**Table S4.** Summary of the EvoEF and EvoEF2 reference energies.

**Table S5.** Folding assessment results obtained by I-TASSER for the 148 test set monomers.

**Table S6.** 29 X-ray/NMR structure pairs used for protein sequence design.

**Table S7.** Native sequence recapitulation results from designing 88 test set dimers using EvoEF2-mon. EvoEF2-mon is the EvoEF2 energy function that uses all of the EvoEF2 energy terms but with weights determined by designing monomer proteins (see main text).

**Table S8.** Native sequence recapitulation results from designing 88 test set dimers using EvoEF and the final optimized EvoEF2 energy function.

**Table S9.** Native sequence recapitulation results from designing 132 test set dimers using EvoEF and the final optimized EvoEF2 energy function.

#### Supporting Figures

**Fig. S1.** Sequence identity between the native and designed sequences using EvoEF2 as a function of crystal structure resolution (A) and protein length (B).

**Fig. S2.** Sequence recovery rates for the 148 test set monomers using different EvoEF2 energy functions. The columns marked with ‘EvoEF2’, ‘SS=0’, ‘AAPP=0’, ‘RAMA=0’, ‘ROT=0’ and ‘Four=0’ signify designs performed using the complete EvoEF2 energy function or disabling the disulfide bond term, amino acid propensity term, Ramachandran energy term, Dunbrack rotamer probability term, or each of the four new terms, respectively.

**Fig. S3.** Sequence design for 29 X-ray/NMR structure pairs. The free energy (in EvoEF2 energy units) is plotted against the sequence identity (over all residues) between the designed and native sequences. In each subplot, the first PDB ID is the X-ray structure code and the second is the NMR PDB code. The results for the X-ray crystal structures are shown as filled blue squares, while the results for the NMR structures are shown as open red circles.

**Fig. S4.** Sequence design performance on X-ray and NMR templates using EvoEF2. The difference of sequence identity on the Y axis is calculated as  $\text{SequenceIdentity}_{(\text{X-ray})} - \text{SequenceIdentity}_{(\text{NMR})}$ . (A) Performance on the X-ray template is compared to the average performance over all NMR templates in the corresponding ensemble. (B) Performance on the X-ray template is compared to performance on the best performing NMR template.

## Supporting Texts

**Text S1.** The EvoEF energy function.

EvoEF is a physics-based energy function designed to describe the atomic interactions in proteins for design scoring and was first implemented in our protein design protocol EvoDesign (Pearce, et al., 2019). In general, it consists of five energy terms:

$$E_{EvoEF} = E_{VDW} + E_{ELEC} + E_{HB} + E_{DESOLV} - E_{REF} \quad (S1)$$

$$E_{VDW} = \sum_{i,j} w_{vdw} E_{vdw}(i,j) \quad (S2)$$

$$E_{ELEC} = \sum_{i,j} w_{elec} E_{elec}(i,j) \quad (S3)$$

$$E_{HB} = \sum_{i,j} w_{hb} E_{hb}(i,j) \quad (S4)$$

$$E_{DESOLV} = \sum_{i,j} w_{desolv} E_{desolv}(i,j) \quad (S5)$$

$$E_{REF} = \sum_{l=1}^L E_{ref}(aa_l) \quad (S6)$$

Here,  $E_{VDW}$ ,  $E_{ELEC}$ ,  $E_{HB}$ ,  $E_{DESOLV}$ , and  $E_{REF}$  are the total van der Waals, electrostatic, hydrogen bonding, desolvation and reference energies for a protein.  $E_{vdw}(i,j)$ ,  $E_{elec}(i,j)$ ,  $E_{hb}(i,j)$ , and  $E_{desolv}(i,j)$  are the pairwise interactions between non-bonded atoms  $i$  and  $j$ , and  $w_{vdw}$ ,  $w_{elec}$ ,  $w_{hb}$  and  $w_{desolv}$  are the relative weights for the corresponding energy terms.  $E_{ref}(aa_l)$  is the amino acid-specific reference energy used to model the energy of an amino acid in the unfolded state, and the reference energy of a protein ( $E_{REF}$ ) is assumed to be the summation of the amino acid-specific  $E_{ref}(aa_l)$  values at position  $l$  across the whole protein chain with length  $L$ , where  $E_{ref}(aa_l)$  is a parameter that was determined for each amino acid  $aa$ .

$E_{vdw}(i,j)$ , is the van der Waals energy between atoms  $i$  and  $j$ , which is modified from the Lennard-Jones (LJ) 12-6 potential (Jones, 1924; Jones, 1924), which describes atomic packing interactions:

$$E_{vdw}(i,j) = \begin{cases} \min \left\{ 5.0\varepsilon_{ij}, \varepsilon_{ij} \left[ \left( \frac{\sigma_{ij}}{d_{ij}} \right)^{12} - 2 \left( \frac{\sigma_{ij}}{d_{ij}} \right)^6 \right] \right\}, & \text{if } d_{ij} < 0.8909\sigma_{ij} \\ \varepsilon_{ij} \left[ \left( \frac{\sigma_{ij}}{d_{ij}} \right)^{12} - 2 \left( \frac{\sigma_{ij}}{d_{ij}} \right)^6 \right], & \text{if } 0.8909\sigma_{ij} \leq d_{ij} < 5.0 \\ A * d_{ij}^3 + B * d_{ij}^2 + C * d_{ij} + D, & \text{if } 5.0 \leq d_{ij} < 6.0 \\ 0, & \text{if } d_{ij} \geq 6.0 \end{cases} \quad (S7)$$

$$\begin{cases} A = -0.4\varepsilon_{ij} \left( \frac{\sigma_{ij}}{5.0} \right)^{12} - 1.6\varepsilon_{ij} \left( \frac{\sigma_{ij}}{5.0} \right)^6 \\ B = 7.8\varepsilon_{ij} \left( \frac{\sigma_{ij}}{5.0} \right)^{12} + 25.2\varepsilon_{ij} \left( \frac{\sigma_{ij}}{5.0} \right)^6 \\ C = -50.4\varepsilon_{ij} \left( \frac{\sigma_{ij}}{5.0} \right)^{12} + 129.6\varepsilon_{ij} \left( \frac{\sigma_{ij}}{5.0} \right)^6 \\ D = 108\varepsilon_{ij} \left( \frac{\sigma_{ij}}{5.0} \right)^{12} + 216\varepsilon_{ij} \left( \frac{\sigma_{ij}}{5.0} \right)^6 \end{cases} \quad (S8)$$

where  $d_{ij}$  is the distance between the two atoms  $i$  and  $j$ ,  $\sigma_{ij} = \sigma_i + \sigma_j$  is the sum of their van der Waals atomic radii and  $\varepsilon_{ij}$  is the combined well-depth for atoms  $i$  and  $j$ , which is taken from the CHARMM19

force field (Brooks, et al., 1983). The attractive and repulsive components of the van der Waals energy are split at  $d_{ij} = 0.8909\sigma_{ij}$ . A maximum distance cutoff of 6.0 Å is set to increase the computational efficiency of EvoEF, and a cubic function is used to continuously connect the LJ energy from its value at 5.0 Å to zero at the cutoff distance (6.0 Å). For the repulsive component of the LJ potential, the maximum energy cutoff is set to  $5.0\epsilon_{ij}$ , which helps alleviate possible clashes, while not overly penalizing them due to the discrete rotameric conformations used in protein design. The weights for the attractive and repulsive energies were separately determined.

$E_{elec}(i, j)$  is used to determine the electrostatic interactions between partially charged, non-bonded atoms  $i$  and  $j$  in a protein:

$$E_{elec}(i, j) = \begin{cases} \frac{C_0 q_i q_j}{\epsilon(0.8\sigma_{ij}) 0.8\sigma_{ij}}, & \text{if } d_{ij} < 0.8\sigma_{ij} \\ \frac{C_0 q_i q_j}{\epsilon(d_{ij}) d_{ij}}, & \text{if } 0.8\sigma_{ij} < d_{ij} < 6.0 \\ 0, & \text{if } d_{ij} \geq 6.0 \end{cases} \quad (S9)$$

where  $q_i$  and  $q_j$  are the CHARMM19 atomic charges (Brooks, et al., 1983). Furthermore,  $C_0 = 332 \text{ Å kcal mol}^{-1} e^{-2}$ , where  $e$  is the elementary charge, and  $\epsilon(d_{ij})$  is the distance-dependent dielectric constant, defined as  $\epsilon(d_{ij}) = 40d_{ij}$ . The distance  $d_{ij}$  is set to  $0.8\sigma_{ij}$  if  $d_{ij}$  is less than  $0.8\sigma_{ij}$ , when calculating the electrostatics term and dielectric constant. This avoids an infinite electrostatic energy value when  $d_{ij}$  is close to zero. Again, for the sake of computational efficiency, the electrostatics energy is set to zero if  $d_{ij}$  is beyond the maximum distance cutoff of 6.0 Å.

$E_{hb}(i, j)$  is used to calculate the hydrogen-bonding interactions between potential hydrogen bond donor/acceptor pairs for atoms  $i$  and  $j$ , one of which should be a polar hydrogen.  $E_{hb}(i, j)$  is a linear combination of three energy terms that depend on the hydrogen-acceptor distance ( $d_{ij}^{HA}$ ), the angle between the donor atom, hydrogen and acceptor ( $\theta_{ij}^{DHA}$ ), and the angle between the hydrogen, acceptor and base atom ( $\varphi_{ij}^{HAB}$ ):

$$E_{hb}(i, j) = w_{d_{HA}} E(d_{ij}^{HA}) + w_{\theta_{DHA}} E(\theta_{ij}^{DHA}) + w_{\varphi_{HAB}} E(\varphi_{ij}^{HAB}) \quad (S10)$$

where:

$$\begin{cases} E(d_{ij}^{HA}) = \begin{cases} -\cos\left[\frac{\pi}{2}(d_{ij}^{HA} - 1.9)/(1.9 - d_{min})\right], & d_{min} \leq d_{HA} \leq 1.9 \\ -0.5 \cos\left[\pi(d_{ij}^{HA} - 1.9)/(d_{max} - 1.9)\right] - 0.5, & 1.9 \text{ Å} < d_{HA} \leq d_{max} \\ 0, & \text{otherwise} \end{cases} \\ E(\theta_{ij}^{DHA}) = -\cos^4(\theta_{ij}^{DHA}), \theta_{ij}^{DHA} \geq 90^\circ \\ E(\varphi_{ij}^{HAB}) = \begin{cases} -\cos^4(\varphi_{ij}^{HAB} - 150^\circ), \varphi_{ij}^{HAB} \geq 80^\circ & \text{for BBHB and for } sp^2 \text{ in SBHB or SSHB} \\ -\cos^4(\varphi_{ij}^{HAB} - 135^\circ), \varphi_{ij}^{HAB} \geq 80^\circ & \text{for } sp^3 \text{ in SBHB or SSHB} \end{cases} \end{cases} \quad (S11)$$

The optimal distance between the hydrogen and its acceptor is set to 1.9 Å, which is taken from Kortemme *et al.* (Kortemme, et al., 2003). Additionally,  $d_{min} = 1.4 \text{ Å}$  and  $d_{max} = 3.0 \text{ Å}$  are the lower and upper bounds on the distance between the hydrogen-acceptor pair. The optimal  $\varphi_{ij}^{HAB}$  value is set to either  $150^\circ$  or  $135^\circ$ , depending on the acceptor hybridization ( $sp^2$  or  $sp^3$ ) and the locations of the donor and acceptor atoms (BBHB: Backbone-Backbone Hydrogen Bond; SBHB: Sidechain-Backbone Hydrogen Bond; SSHB: Sidechain-Sidechain Hydrogen Bond).

$E_{desolv}(i, j)$  is used to describe the desolvation energy using the pairwise gaussian volume-excluded implicit solvation model developed by Lazaridis and Karplus (Lazaridis and Karplus, 1999). The pairwise  $E_{desolv}(i, j)$  is calculated as the sum of the desolvation energies for atom  $i$  desolvating  $j$  ( $f_{desolv}(i, j)$ ) and for  $j$  desolvating  $i$  ( $f_{desolv}(j, i)$ ), as shown in Eq. S12:

$$E_{desolv}(i, j) = f_{desolv}(i, j) + f_{desolv}(j, i) \quad (S12)$$

$$f_{desolv}(i, j) = -V_j \frac{\Delta G_i^{free}}{2\pi^{\frac{3}{2}}\lambda_i d_{ij}^2} \exp\left[-\left(\frac{d_{ij} - \sigma_i}{\lambda_i}\right)^2\right] \quad (S13)$$

$$f_{desolv}(j, i) = -V_i \frac{\Delta G_j^{free}}{2\pi^{\frac{3}{2}}\lambda_j d_{ij}^2} \exp\left[-\left(\frac{d_{ij} - \sigma_j}{\lambda_j}\right)^2\right] \quad (S14)$$

where  $V_{i,j}$ ,  $\Delta G_{i,j}^{free}$ , and  $\lambda_{i,j}$  are the volumes, reference solvation energies, and correlation lengths for atoms  $i$  and  $j$ , respectively. All types of carbon and sulfur atoms are considered as nonpolar, while oxygen and nitrogen atoms are polar. The desolvation energy for hydrogen atoms is ignored in the Lazaridis-Karplus model, while the desolvation energy for other polar and nonpolar atoms are separately calculated and weighted. Specifically,  $E_{DESOLV} = \sum w_{desolvPolar} f_{desolvPolar} + \sum w_{desolvNonP} f_{desolvNonP}$ .

The parameter optimization and benchmark procedure of EvoEF was described in detail in the previous study (Pearce, et al., 2019). Briefly, EvoEF is not only benchmarked on 3,989 non-redundant protein monomer stability change data from 201 proteins taken from the FoldX and STRUM datasets (Guerois, et al., 2002; Quan, et al., 2016), but also on 2,204 non-redundant protein-protein binding affinity change data from 177 dimeric complexes taken from the SKEMPI v2.0 database (Jankauskaite, et al., 2018). Each dataset was randomly split in half into training and test sets. Our test results showed that EvoEF slightly outperformed FoldX in both tests. With respect to the protein stability change prediction, EvoEF obtained a PCC/RMSE of 0.472/1.751 kcal/mol, while FoldX obtained a PCC/RMSE of 0.465/2.010 kcal/mol; for protein-protein binding affinity change prediction, EvoEF obtained a PCC/RMSE of 0.514/2.109 kcal/mol, while FoldX obtained a PCC/RMSE of 0.490/2.248 kcal/mol.

**Text S2.** The EvoEF2 energy function.

In EvoEF2, the five original terms from EvoEF are preserved, but the weights and reference energies were determined differently (see Text S3). Moreover, four new terms were introduced to make EvoEF2 capable of tackling more difficult design cases and to fully utilize the structural information present in a given protein backbone. First, disulfide bonds exist in many proteins, but in EvoEF there is no term to model the possible formation of disulfide bonds. Since the length of a disulfide bond is around 2 Å, which is much less than the sum of the van der Waals radii of two sulfur atoms, possible disulfide-bond configurations in EvoEF may incur large clash penalties. Hence, we considered explicitly modeling disulfide bonds in EvoEF2. Second, the 20 canonical amino acids have different side-chain groups, and for the same amino acid, there may exist different rotamers. The different amino acids and rotamers exhibit distinct propensities and may occur at various frequencies at different protein backbone positions. To model this propensity, we introduced amino acid propensity, Ramachandran and Dunbrack rotamer probability terms into EvoEF2. The complete EvoEF2 energy function is written as:

$$E_{EvoEF2} = E_{VDW} + E_{ELEC} + E_{HB} + E_{DESOLV} + E_{SS} + E_{AAPP} + E_{RAMA} + E_{ROT} - E_{REF} \quad (S15)$$

Here,  $E_{SS}$  describes the disulfide-bonding interactions which are modeled as follows:

$$\begin{aligned} E_{SS} = \sum_{i,j} w_{SS} & \left[ 0.8 \times \left( 1 - e^{-10(d_{ij}^{S_{\gamma 1} S_{\gamma 2}} - 2.03)} \right)^2 + 0.005 \times \left( \theta_{ij}^{C_{\beta 1} S_{\gamma 1} S_{\gamma 2}} - 105^\circ \right)^2 + 0.005 \right. \\ & \times \left( \theta_{ij}^{C_{\beta 2} S_{\gamma 2} S_{\gamma 1}} - 105^\circ \right)^2 + \left( \cos \left( 2\chi_{ij}^{C_{\beta 1} S_{\gamma 1} S_{\gamma 2} C_{\beta 2}} \right) + 1 \right) + 1.25 \\ & \times \sin \left( \chi_{ij}^{C_{\alpha 1} C_{\beta 1} S_{\gamma 1} S_{\gamma 2}} + 120^\circ \right) - 1.75 + 1.25 \times \sin \left( \chi_{ij}^{C_{\alpha 2} C_{\beta 2} S_{\gamma 2} S_{\gamma 1}} + 120^\circ \right) \\ & \left. - 1.75 \right] \end{aligned} \quad (S16)$$

where  $w_{SS}$  is the weight factor, atom pair  $i$  and  $j$  represent the two  $S_\gamma$  atoms from two different cysteines,  $d_{ij}^{S_{\gamma 1} S_{\gamma 2}}$  is the distance between them,  $\theta_{ij}^{C_{\beta 1} S_{\gamma 1} S_{\gamma 2}}$  is the angle between atoms  $C_{\beta 1}$ ,  $S_{\gamma 1}$ , and  $S_{\gamma 2}$ ,  $\theta_{ij}^{C_{\beta 2} S_{\gamma 2} S_{\gamma 1}}$  is the angle between atoms  $C_{\beta 2}$ ,  $S_{\gamma 2}$  and  $S_{\gamma 1}$ ,  $\chi_{ij}^{C_{\beta 1} S_{\gamma 1} S_{\gamma 2} C_{\beta 2}}$  is the torsion angle between atoms  $C_{\beta 1}$ ,  $S_{\gamma 1}$ ,  $S_{\gamma 2}$  and  $C_{\beta 2}$ ,  $\chi_{ij}^{C_{\alpha 1} C_{\beta 1} S_{\gamma 1} S_{\gamma 2}}$  is the torsional angle between atoms  $C_{\alpha 1}$ ,  $C_{\beta 1}$ ,  $S_{\gamma 1}$  and  $S_{\gamma 2}$ , and  $\chi_{ij}^{C_{\alpha 2} C_{\beta 2} S_{\gamma 2} S_{\gamma 1}}$  is the torsional angle between atoms  $C_{\alpha 2}$ ,  $C_{\beta 2}$ ,  $S_{\gamma 2}$  and  $S_{\gamma 1}$ . The distance  $d_{ij}^{S_{\gamma 1} S_{\gamma 2}}$  must be within [1.95, 2.15] in order to calculate  $E_{SS}(i, j)$ , and  $E_{SS}(i, j)=0$  if  $E_{SS}(i, j)>0$  or  $d_{ij}^{S_{\gamma 1} S_{\gamma 2}} \notin [1.95, 2.15]$ .

$E_{AAPP}$  represents the energy for calculating amino acid propensities at given backbone ( $\phi/\psi$ ) angles by

$$E_{AAPP} = \sum_{1 \leq l \leq L} -w_{aapp} \ln \frac{P(aa_l | \phi_l, \psi_l)}{P(aa_l)} \quad (S17)$$

where  $w_{aapp}$  is the weight parameter,  $l$  is the design position,  $aa_l$  and  $(\phi_l, \psi_l)$  are the amino acid type and backbone torsional angles, respectively, at position  $l$ .  $P(aa_l | \phi_l, \psi_l)$  and  $P(aa_l)$  are the probabilities of observing amino acid  $aa_l$  at a given  $(\phi_l, \psi_l)$  and any backbone torsional angle, respectively. The statistics were obtained from the Top8000 dataset (Chen, et al., 2010) using a grid step of 10° for  $\phi$  and  $\psi$ . Following a similar strategy to (Krivov, et al., 2009), for the N-terminal residue and other residues whose  $\phi$  angle cannot be determined by backbone (due to missing backbone atoms),  $\phi$  is set to -60°, and similarly, for the C-terminal residue and other residues whose  $\psi$  angle cannot be determined by backbone (due to missing backbone atoms),  $\psi$  is set to 60°. This is also applicable to the calculation of  $E_{RAMA}$  and  $E_{ROT}$ .

$E_{RAMA}$  is the Ramachandran term for choosing specific backbone angles ( $\phi/\psi$ ) given a particular amino acid:

$$E_{RAMA} = \sum_{1 \leq l \leq L} -w_{rama} \ln P(\phi_l, \psi_l | aa_l) \quad (\text{S18})$$

where  $w_{rama}$  is the weight parameter. This term is used to calculate how suitable the backbone  $(\phi_l, \psi_l)$  is given  $aa_l$ . The statistics were obtained using the same dataset and grid step mentioned above (Chen, et al., 2010).

Finally,  $E_{ROT}$  is the energy term for modeling the rotamer probabilities from the rotamer library:

$$E_{ROT} = \sum_{1 \leq l \leq L} -w_{rot} \ln P(rot_l) \quad (\text{S19})$$

where  $w_{rot}$  is the corresponding weight.  $P(rot_l)$  is the probability of seeing a rotamer  $rot_l$  at position  $l$  for an amino acid type, which is directly taken from Dunbrack's 2010 backbone-dependent rotamer library (Shapovalov and Dunbrack, 2011) without further modification.

**Text S3.** Optimization of weights and reference energies in EvoEF2.

EvoEF was optimized and benchmarked by using two large sets of thermodynamic change data upon mutation, where the parameterization procedure of EvoEF was previously described in detail (Pearce, et al., 2019). We optimized EvoEF2 using a procedure similar to the one-at-a-time approach used by Rosetta (Kuhlman and Baker, 2000; Leaver-Fay, et al., 2013) and Medusa (Ding and Dokholyan, 2006). Specifically, the weights for each energy term and the 20 reference energies were determined by maximizing the product of  $e^{-E_{min}(AA_{nat}|w)} / \sum_i e^{-E_{min}(AA_i|w)}$  across all of the residues positions for a training set of 222 monomers using a gradient descent optimization procedure, where  $E_{min}(AA_{nat}|w)$  was the energy of the best rotamer for the native amino acid  $AA_{nat}$  given the weight set ( $w$ ),  $E_{min}(AA_i|w)$  was the energy of the best rotamer for amino acid  $AA_i$  using the same weight set,  $w$ , and the partition function was over all 20 amino acids at each position. The rotamers were taken from Dunbrack’s backbone-dependent 2010 rotamer library (Shapovalov and Dunbrack, 2011). The energies for the rotamers at each position were calculated in the context of fixed surrounding residues. The determined weights and reference energies were then refined based on the results of complete sequence design for the same training proteins to reduce the deviation of the 20 amino acid distributions between the designed sequences and the native sequences. Similarly, optimization of the weights for inter-chain interactions was first determined by maximizing the product of  $e^{-E_{min}(AA_{nat}|w)} / \sum_i e^{-E_{min}(AA_i|w)}$  over the interface residues positions for a training set of 132 dimers, where the weights for the monomeric energy terms and reference energies were fixed. The weights were also refined by complete PPI sequence design simulations for the 132 dimers.

**Text S4. Protein design procedure.**

We extended the EvoDesign Monte Carlo (MC) pipeline (Pearce, et al., 2019) to test the ability of EvoEF and EvoEF2 to perform protein design. Starting from a random sequence, a simulated annealing Monte Carlo (SAMC) (Kirkpatrick, et al., 1983) procedure was used to explore the sequence space for fixed protein backbones, where the MC movement consisted of exchanging one rotamer for another at a randomly chosen position. All amino acid types were considered at each design position and their side-chain conformations were taken from Dunbrack's 2010 backbone-dependent rotamer library (Shapovalov and Dunbrack, 2011). Rarely seen rotamers with probabilities < 3% were excluded (Kuhlman and Baker, 2000), yielding about a total of 165 rotamers for each amino acid at a given site. An MC move was accepted or rejected according to the Metropolis rule, where the acceptance probability for an unfavorable energy increase,  $\Delta E$ , was  $e^{-\Delta E/T}$ . The temperature  $T$  varied from  $T_{\text{high}} = 5$  to  $T_{\text{low}} = 0.01$  with a decrease factor of 0.8, and three SAMC cycles were performed for convergence. We did not use a protein length-dependent temperature because  $\Delta E$  did not exhibit strong length dependency. The number of MC steps at each temperature was determined as the sum of the number of rotamers at all designed positions, approximately equal to  $165 \times L$  for a protein with  $L$  amino acids. This SAMC procedure was very fast, and for instance, it took less than 15 minutes to completely design a protein that was about 200 amino acids long. Because MC-based methods do not guarantee the global optimum solution, for a given structure, we performed ten independent simulation trajectories starting from different random sequences and selected the lowest-energy sequence as the final design and used it for comparison with the native sequence. In fact, the SAMC simulation procedure converged well and in almost all cases the sequences obtained from different runs shared > 85% sequence identity and had similar energies, and the designed sequences in the core region were nearly identical.



### Supporting Tables

**Table S1.** Native sequence recapitulation results from designing 148 test set monomers using EvoEF and EvoEF2. ‘#nat’ is the number of native residues, ‘#des’ is the number of designed residues and ‘#id’ is the number of residues with recapitulated identities (the same designations are used in Table S2 and Table S7-9).

| Residue              | EvoEF        |              |             |              |              | EvoEF2       |              |             |              |              |
|----------------------|--------------|--------------|-------------|--------------|--------------|--------------|--------------|-------------|--------------|--------------|
|                      | #nat         | #des         | #id         | #id/#nat     | #id/#des     | #nat         | #des         | #id         | #id/#nat     | #id/#des     |
| <i>All residues</i>  |              |              |             |              |              |              |              |             |              |              |
| Ala                  | 1945         | 832          | 337         | 0.173        | 0.405        | 1945         | 2010         | 722         | 0.371        | 0.359        |
| Cys                  | 373          | 906          | 37          | 0.099        | 0.041        | 373          | 384          | 71          | 0.190        | 0.185        |
| Asp                  | 1333         | 1999         | 180         | 0.135        | 0.090        | 1333         | 1298         | 368         | 0.276        | 0.284        |
| Glu                  | 1670         | 1660         | 141         | 0.084        | 0.085        | 1670         | 1606         | 281         | 0.168        | 0.175        |
| Phe                  | 951          | 371          | 106         | 0.111        | 0.286        | 951          | 939          | 309         | 0.325        | 0.329        |
| Gly                  | 1806         | 719          | 613         | 0.339        | 0.853        | 1806         | 1773         | 1338        | 0.741        | 0.755        |
| His                  | 531          | 263          | 32          | 0.060        | 0.122        | 531          | 548          | 68          | 0.128        | 0.124        |
| Ile                  | 1313         | 4890         | 542         | 0.413        | 0.111        | 1313         | 1310         | 555         | 0.423        | 0.424        |
| Lys                  | 1353         | 167          | 16          | 0.012        | 0.096        | 1353         | 1310         | 198         | 0.146        | 0.151        |
| Leu                  | 2219         | 5361         | 837         | 0.377        | 0.156        | 2219         | 2275         | 1177        | 0.530        | 0.517        |
| Met                  | 429          | 351          | 8           | 0.019        | 0.023        | 429          | 436          | 59          | 0.138        | 0.135        |
| Asn                  | 969          | 573          | 50          | 0.052        | 0.087        | 969          | 1071         | 160         | 0.165        | 0.149        |
| Pro                  | 1072         | 534          | 195         | 0.182        | 0.365        | 1072         | 1132         | 558         | 0.521        | 0.493        |
| Gln                  | 871          | 148          | 12          | 0.014        | 0.081        | 871          | 827          | 81          | 0.093        | 0.098        |
| Arg                  | 1257         | 463          | 51          | 0.041        | 0.110        | 1257         | 1240         | 170         | 0.135        | 0.137        |
| Ser                  | 1415         | 581          | 136         | 0.096        | 0.234        | 1415         | 1334         | 262         | 0.185        | 0.196        |
| Thr                  | 1304         | 723          | 87          | 0.067        | 0.120        | 1304         | 1252         | 279         | 0.214        | 0.223        |
| Val                  | 1735         | 2235         | 450         | 0.259        | 0.201        | 1735         | 1770         | 812         | 0.468        | 0.459        |
| Trp                  | 350          | 154          | 14          | 0.040        | 0.091        | 350          | 364          | 49          | 0.140        | 0.135        |
| Tyr                  | 838          | 804          | 141         | 0.168        | 0.175        | 838          | 855          | 201         | 0.240        | 0.235        |
| <b>Total</b>         | <b>23734</b> | <b>23734</b> | <b>3985</b> | <b>0.168</b> | <b>0.168</b> | <b>23734</b> | <b>23734</b> | <b>7718</b> | <b>0.325</b> | <b>0.325</b> |
| <i>Core residues</i> |              |              |             |              |              |              |              |             |              |              |
| Ala                  | 775          | 526          | 253         | 0.326        | 0.481        | 775          | 901          | 468         | 0.604        | 0.519        |
| Cys                  | 198          | 343          | 21          | 0.106        | 0.061        | 198          | 239          | 52          | 0.263        | 0.218        |
| Asp                  | 119          | 885          | 47          | 0.395        | 0.053        | 119          | 150          | 39          | 0.328        | 0.260        |
| Glu                  | 120          | 600          | 23          | 0.192        | 0.038        | 120          | 193          | 31          | 0.258        | 0.161        |
| Phe                  | 438          | 137          | 57          | 0.130        | 0.416        | 438          | 369          | 177         | 0.404        | 0.480        |
| Gly                  | 434          | 313          | 255         | 0.588        | 0.815        | 434          | 346          | 315         | 0.726        | 0.910        |
| His                  | 117          | 115          | 11          | 0.094        | 0.096        | 117          | 100          | 15          | 0.128        | 0.150        |
| Ile                  | 620          | 776          | 256         | 0.413        | 0.330        | 620          | 696          | 338         | 0.545        | 0.486        |

|              |             |             |             |              |              |             |             |             |              |              |
|--------------|-------------|-------------|-------------|--------------|--------------|-------------|-------------|-------------|--------------|--------------|
| Lys          | 88          | 11          | 0           | 0.000        | 0.000        | 88          | 129         | 22          | 0.250        | 0.171        |
| Leu          | 996         | 838         | 371         | 0.372        | 0.443        | 996         | 1147        | 682         | 0.685        | 0.595        |
| Met          | 167         | 45          | 2           | 0.012        | 0.044        | 167         | 220         | 39          | 0.234        | 0.177        |
| Asn          | 133         | 175         | 19          | 0.143        | 0.109        | 133         | 82          | 25          | 0.188        | 0.305        |
| Pro          | 198         | 222         | 94          | 0.475        | 0.423        | 198         | 176         | 121         | 0.611        | 0.688        |
| Gln          | 102         | 27          | 3           | 0.029        | 0.111        | 102         | 63          | 13          | 0.127        | 0.206        |
| Arg          | 138         | 42          | 9           | 0.065        | 0.214        | 138         | 108         | 19          | 0.138        | 0.176        |
| Ser          | 278         | 292         | 66          | 0.237        | 0.226        | 278         | 112         | 39          | 0.140        | 0.348        |
| Thr          | 270         | 240         | 40          | 0.148        | 0.167        | 270         | 252         | 92          | 0.341        | 0.365        |
| Val          | 825         | 646         | 248         | 0.301        | 0.384        | 825         | 933         | 514         | 0.623        | 0.551        |
| Trp          | 139         | 44          | 8           | 0.058        | 0.182        | 139         | 85          | 23          | 0.165        | 0.271        |
| Tyr          | 342         | 220         | 65          | 0.190        | 0.295        | 342         | 196         | 90          | 0.263        | 0.459        |
| <b>Total</b> | <b>6497</b> | <b>6497</b> | <b>1848</b> | <b>0.284</b> | <b>0.284</b> | <b>6497</b> | <b>6497</b> | <b>3114</b> | <b>0.479</b> | <b>0.479</b> |

*Surface residues*

|              |             |             |            |              |              |             |             |             |              |              |
|--------------|-------------|-------------|------------|--------------|--------------|-------------|-------------|-------------|--------------|--------------|
| Ala          | 626         | 72          | 11         | 0.018        | 0.153        | 626         | 542         | 76          | 0.121        | 0.140        |
| Cys          | 40          | 262         | 1          | 0.025        | 0.004        | 40          | 33          | 1           | 0.025        | 0.030        |
| Asp          | 827         | 397         | 50         | 0.060        | 0.126        | 827         | 762         | 211         | 0.255        | 0.277        |
| Glu          | 1079        | 376         | 59         | 0.055        | 0.157        | 1079        | 774         | 144         | 0.133        | 0.186        |
| Phe          | 157         | 73          | 4          | 0.025        | 0.055        | 157         | 235         | 24          | 0.153        | 0.102        |
| Gly          | 808         | 143         | 126        | 0.156        | 0.881        | 808         | 990         | 628         | 0.777        | 0.634        |
| His          | 210         | 43          | 6          | 0.029        | 0.140        | 210         | 244         | 23          | 0.110        | 0.094        |
| Ile          | 243         | 2711        | 101        | 0.416        | 0.037        | 243         | 104         | 26          | 0.107        | 0.250        |
| Lys          | 804         | 97          | 10         | 0.012        | 0.103        | 804         | 647         | 85          | 0.106        | 0.131        |
| Leu          | 411         | 2886        | 159        | 0.387        | 0.055        | 411         | 260         | 75          | 0.182        | 0.288        |
| Met          | 124         | 175         | 4          | 0.032        | 0.023        | 124         | 56          | 2           | 0.016        | 0.036        |
| Asn          | 561         | 181         | 12         | 0.021        | 0.066        | 561         | 767         | 94          | 0.168        | 0.123        |
| Pro          | 606         | 130         | 33         | 0.054        | 0.254        | 606         | 687         | 284         | 0.469        | 0.413        |
| Gln          | 473         | 69          | 4          | 0.008        | 0.058        | 473         | 492         | 41          | 0.087        | 0.083        |
| Arg          | 630         | 285         | 22         | 0.035        | 0.077        | 630         | 629         | 67          | 0.106        | 0.107        |
| Ser          | 714         | 101         | 24         | 0.034        | 0.238        | 714         | 953         | 160         | 0.224        | 0.168        |
| Thr          | 549         | 260         | 14         | 0.026        | 0.054        | 549         | 571         | 80          | 0.146        | 0.140        |
| Val          | 336         | 899         | 44         | 0.131        | 0.049        | 336         | 226         | 53          | 0.158        | 0.235        |
| Trp          | 63          | 36          | 0          | 0.000        | 0.000        | 63          | 147         | 5           | 0.079        | 0.034        |
| Tyr          | 163         | 228         | 12         | 0.074        | 0.053        | 163         | 305         | 23          | 0.141        | 0.075        |
| <b>Total</b> | <b>9424</b> | <b>9424</b> | <b>696</b> | <b>0.074</b> | <b>0.074</b> | <b>9424</b> | <b>9424</b> | <b>2102</b> | <b>0.223</b> | <b>0.223</b> |

---

**Table S2.** Native sequence recapitulation results from designing 222 training set monomers using EvoEF and EvoEF2.

| Residue              | EvoEF        |              |             |              |              | EvoEF2       |              |              |              |              |
|----------------------|--------------|--------------|-------------|--------------|--------------|--------------|--------------|--------------|--------------|--------------|
|                      | #nat         | #des         | #id         | #id/#nat     | #id/#des     | #nat         | #des         | #id          | #id/#nat     | #id/#des     |
| <i>All residues</i>  |              |              |             |              |              |              |              |              |              |              |
| Ala                  | 2683         | 1192         | 434         | 0.162        | 0.364        | 2683         | 2832         | 994          | 0.370        | 0.351        |
| Cys                  | 555          | 1207         | 57          | 0.103        | 0.047        | 555          | 497          | 77           | 0.139        | 0.155        |
| Asp                  | 1902         | 2837         | 272         | 0.143        | 0.096        | 1902         | 1959         | 537          | 0.282        | 0.274        |
| Glu                  | 2286         | 2379         | 196         | 0.086        | 0.082        | 2286         | 2437         | 388          | 0.170        | 0.159        |
| Phe                  | 1309         | 489          | 148         | 0.113        | 0.303        | 1309         | 1378         | 467          | 0.357        | 0.339        |
| Gly                  | 2511         | 960          | 830         | 0.331        | 0.865        | 2511         | 2511         | 1856         | 0.739        | 0.739        |
| His                  | 774          | 336          | 30          | 0.039        | 0.089        | 774          | 819          | 93           | 0.120        | 0.114        |
| Ile                  | 1888         | 7206         | 780         | 0.413        | 0.108        | 1888         | 1881         | 827          | 0.438        | 0.440        |
| Lys                  | 2009         | 170          | 19          | 0.009        | 0.112        | 2009         | 1962         | 302          | 0.150        | 0.154        |
| Leu                  | 3198         | 7704         | 1229        | 0.384        | 0.160        | 3198         | 3126         | 1691         | 0.529        | 0.541        |
| Met                  | 616          | 456          | 11          | 0.018        | 0.024        | 616          | 606          | 79           | 0.128        | 0.130        |
| Asn                  | 1426         | 819          | 81          | 0.057        | 0.099        | 1426         | 1387         | 213          | 0.149        | 0.154        |
| Pro                  | 1520         | 819          | 284         | 0.187        | 0.347        | 1520         | 1566         | 769          | 0.506        | 0.491        |
| Gln                  | 1389         | 246          | 23          | 0.017        | 0.093        | 1389         | 1281         | 143          | 0.103        | 0.112        |
| Arg                  | 1770         | 644          | 70          | 0.040        | 0.109        | 1770         | 1823         | 241          | 0.136        | 0.132        |
| Ser                  | 2062         | 754          | 134         | 0.065        | 0.178        | 2062         | 1949         | 401          | 0.194        | 0.206        |
| Thr                  | 1893         | 1071         | 118         | 0.062        | 0.110        | 1893         | 1789         | 395          | 0.209        | 0.221        |
| Val                  | 2433         | 3181         | 627         | 0.258        | 0.197        | 2433         | 2416         | 1095         | 0.450        | 0.453        |
| Trp                  | 431          | 231          | 32          | 0.074        | 0.139        | 431          | 482          | 64           | 0.148        | 0.133        |
| Tyr                  | 1196         | 1150         | 230         | 0.192        | 0.200        | 1196         | 1150         | 270          | 0.226        | 0.235        |
| <b>Total</b>         | <b>33851</b> | <b>33851</b> | <b>5605</b> | <b>0.166</b> | <b>0.166</b> | <b>33851</b> | <b>33851</b> | <b>10902</b> | <b>0.322</b> | <b>0.322</b> |
| <i>Core residues</i> |              |              |             |              |              |              |              |              |              |              |
| Ala                  | 1056         | 714          | 321         | 0.304        | 0.450        | 1056         | 1208         | 614          | 0.581        | 0.508        |
| Cys                  | 283          | 444          | 28          | 0.099        | 0.063        | 283          | 345          | 61           | 0.216        | 0.177        |
| Asp                  | 209          | 1181         | 72          | 0.344        | 0.061        | 209          | 212          | 71           | 0.340        | 0.335        |
| Glu                  | 142          | 867          | 27          | 0.190        | 0.031        | 142          | 283          | 35           | 0.246        | 0.124        |
| Phe                  | 578          | 195          | 81          | 0.140        | 0.415        | 578          | 472          | 241          | 0.417        | 0.511        |
| Gly                  | 588          | 404          | 340         | 0.578        | 0.842        | 588          | 477          | 406          | 0.690        | 0.851        |
| His                  | 184          | 150          | 16          | 0.087        | 0.107        | 184          | 164          | 30           | 0.163        | 0.183        |
| Ile                  | 893          | 1129         | 349         | 0.391        | 0.309        | 893          | 1023         | 529          | 0.592        | 0.517        |
| Lys                  | 124          | 15           | 2           | 0.016        | 0.133        | 124          | 180          | 25           | 0.202        | 0.139        |
| Leu                  | 1446         | 1135         | 550         | 0.380        | 0.485        | 1446         | 1559         | 985          | 0.681        | 0.632        |
| Met                  | 234          | 83           | 5           | 0.021        | 0.060        | 234          | 320          | 49           | 0.209        | 0.153        |
| Asn                  | 170          | 229          | 19          | 0.112        | 0.083        | 170          | 83           | 24           | 0.141        | 0.289        |

|              |             |             |             |              |              |             |             |             |              |              |
|--------------|-------------|-------------|-------------|--------------|--------------|-------------|-------------|-------------|--------------|--------------|
| Pro          | 230         | 276         | 108         | 0.470        | 0.391        | 230         | 220         | 142         | 0.617        | 0.645        |
| Gln          | 161         | 59          | 5           | 0.031        | 0.085        | 161         | 122         | 22          | 0.137        | 0.180        |
| Arg          | 237         | 50          | 17          | 0.072        | 0.340        | 237         | 135         | 34          | 0.143        | 0.252        |
| Ser          | 361         | 367         | 51          | 0.141        | 0.139        | 361         | 146         | 45          | 0.125        | 0.308        |
| Thr          | 367         | 352         | 44          | 0.120        | 0.125        | 367         | 369         | 114         | 0.311        | 0.309        |
| Val          | 1114        | 962         | 353         | 0.317        | 0.367        | 1114        | 1295        | 693         | 0.622        | 0.535        |
| Trp          | 168         | 79          | 19          | 0.113        | 0.241        | 168         | 108         | 25          | 0.149        | 0.231        |
| Tyr          | 430         | 284         | 92          | 0.214        | 0.324        | 430         | 254         | 107         | 0.249        | 0.421        |
| <b>Total</b> | <b>8975</b> | <b>8975</b> | <b>2499</b> | <b>0.278</b> | <b>0.278</b> | <b>8975</b> | <b>8975</b> | <b>4252</b> | <b>0.474</b> | <b>0.474</b> |

*Surface residues*

|              |              |              |             |              |              |              |              |             |              |              |
|--------------|--------------|--------------|-------------|--------------|--------------|--------------|--------------|-------------|--------------|--------------|
| Ala          | 888          | 118          | 12          | 0.014        | 0.102        | 888          | 809          | 122         | 0.137        | 0.151        |
| Cys          | 67           | 380          | 8           | 0.119        | 0.021        | 67           | 38           | 1           | 0.015        | 0.026        |
| Asp          | 1188         | 585          | 82          | 0.069        | 0.140        | 1188         | 1162         | 304         | 0.256        | 0.262        |
| Glu          | 1493         | 573          | 70          | 0.047        | 0.122        | 1493         | 1227         | 208         | 0.139        | 0.170        |
| Phe          | 202          | 90           | 4           | 0.020        | 0.044        | 202          | 331          | 36          | 0.178        | 0.109        |
| Gly          | 1154         | 213          | 192         | 0.166        | 0.901        | 1154         | 1386         | 901         | 0.781        | 0.650        |
| His          | 296          | 63           | 2           | 0.007        | 0.032        | 296          | 356          | 22          | 0.074        | 0.062        |
| Ile          | 324          | 3938         | 149         | 0.460        | 0.038        | 324          | 127          | 36          | 0.111        | 0.283        |
| Lys          | 1214         | 87           | 11          | 0.009        | 0.126        | 1214         | 962          | 146         | 0.120        | 0.152        |
| Leu          | 554          | 4245         | 200         | 0.361        | 0.047        | 554          | 340          | 94          | 0.170        | 0.276        |
| Met          | 157          | 209          | 4           | 0.025        | 0.019        | 157          | 49           | 4           | 0.025        | 0.082        |
| Asn          | 794          | 276          | 24          | 0.030        | 0.087        | 794          | 1000         | 118         | 0.149        | 0.118        |
| Pro          | 873          | 248          | 67          | 0.077        | 0.270        | 873          | 947          | 399         | 0.457        | 0.421        |
| Gln          | 751          | 81           | 9           | 0.012        | 0.111        | 751          | 768          | 67          | 0.089        | 0.087        |
| Arg          | 872          | 383          | 28          | 0.032        | 0.073        | 872          | 1027         | 121         | 0.139        | 0.118        |
| Ser          | 1118         | 138          | 17          | 0.015        | 0.123        | 1118         | 1415         | 251         | 0.225        | 0.177        |
| Thr          | 871          | 373          | 35          | 0.040        | 0.094        | 871          | 815          | 134         | 0.154        | 0.164        |
| Val          | 500          | 1277         | 75          | 0.150        | 0.059        | 500          | 301          | 76          | 0.152        | 0.252        |
| Trp          | 74           | 43           | 1           | 0.014        | 0.023        | 74           | 171          | 9           | 0.122        | 0.053        |
| Tyr          | 249          | 319          | 23          | 0.092        | 0.072        | 249          | 408          | 46          | 0.185        | 0.113        |
| <b>Total</b> | <b>13639</b> | <b>13639</b> | <b>1013</b> | <b>0.074</b> | <b>0.074</b> | <b>13639</b> | <b>13639</b> | <b>3095</b> | <b>0.227</b> | <b>0.227</b> |

---

**Table S3.** Summary of the weights for each EvoEF and EvoEF2 energy term. The extended terms in EvoEF2 are highlighted in bold.

| Classification                                 | Energy terms                 | EvoEF weight | EvoEF2 weight |
|------------------------------------------------|------------------------------|--------------|---------------|
| Intra-residue interactions                     | Van der Waals attractive     | 0.0000       | 0.43          |
|                                                | Van der Waals repulsive      | 0.1200       | 0.06          |
|                                                | Coulomb's electrostatics     | 0.0000       | 0.29          |
|                                                | desolvP                      | 0.0000       | 0.00          |
|                                                | desolvH                      | 0.0000       | 0.34          |
|                                                | HBsb_dist                    | 0.0000       | 0.83          |
|                                                | HBsb_theta                   | 0.0400       | 0.28          |
|                                                | HBsb_phi                     | 0.0012       | 0.00          |
|                                                | <b>Amino acid propensity</b> | -            | <b>0.59</b>   |
|                                                | <b>Ramachandran</b>          | -            | <b>0.42</b>   |
| <b>DunbrackRot</b>                             | -                            | <b>0.35</b>  |               |
| Inter-residue interactions in the same chain   | Van der Waals attractive     | 0.6076       | 1.21          |
|                                                | Van der Waals repulsive      | 0.4968       | 1.28          |
|                                                | Coulomb's electrostatics     | 0.0000       | 2.31          |
|                                                | desolvP                      | 0.3008       | 0.75          |
|                                                | desolvH                      | 0.0322       | 4.59          |
|                                                | <b>SSbond</b>                | -            | <b>2.72</b>   |
|                                                | HBbb_dist                    | 0.3554       | 1.02          |
|                                                | HBbb_theta                   | 0.0000       | 1.01          |
|                                                | HBbb_phi                     | 0.0000       | 1.07          |
|                                                | HBsb_dist                    | 0.5452       | 0.85          |
|                                                | HBsb_theta                   | 0.2080       | 0.91          |
|                                                | HBsb_phi                     | 0.1600       | 0.17          |
|                                                | HBss_dist                    | 0.3036       | 1.19          |
|                                                | HBss_theta                   | 0.0800       | 0.71          |
| HBss_phi                                       | 0.0000                       | 0.00         |               |
| Inter-residue interactions in different chains | Van der Waals attractive     | 0.6384       | 1.06          |
|                                                | Van der Waals repulsive      | 0.7904       | 0.80          |
|                                                | Coulomb's electrostatics     | 0.0000       | 2.44          |
|                                                | desolvP                      | 0.4048       | 0.68          |
|                                                | desolvH                      | 0.3432       | 4.79          |
|                                                | <b>SSbond</b>                | -            | <b>1.07</b>   |
|                                                | HBbb_dist                    | 0.0000       | 1.01          |
|                                                | HBbb_theta                   | 0.7600       | 1.01          |
|                                                | HBbb_phi                     | 0.5000       | 1.02          |
|                                                | HBsb_dist                    | 0.0000       | 0.94          |
|                                                | HBsb_theta                   | 0.6552       | 0.70          |
|                                                | HBsb_phi                     | 0.5236       | 0.32          |
|                                                | HBss_dist                    | 0.7200       | 0.94          |
|                                                | HBss_theta                   | 0.6720       | 0.97          |
| HBss_phi                                       | 0.5040                       | 0.00         |               |

**Table S4.** Summary of the EvoEF and EvoEF2 reference energies.

| Amino acid | EvoEF reference energy | EvoEF2 reference energy |
|------------|------------------------|-------------------------|
| ALA        | 1.200                  | -0.408                  |
| CYS        | 0.600                  | -0.111                  |
| ASP        | 1.200                  | -0.802                  |
| GLU        | 1.000                  | -1.225                  |
| PHE        | 2.000                  | 0.679                   |
| GLY        | 2.000                  | -2.093                  |
| HIS        | 2.200                  | -0.295                  |
| ILE        | -0.120                 | 2.330                   |
| LYS        | 1.200                  | -1.250                  |
| LEU        | 0.000                  | 1.613                   |
| MET        | 1.000                  | 0.759                   |
| ASN        | 1.000                  | -2.155                  |
| PRO        | 0.960                  | -0.647                  |
| GLN        | 1.400                  | -1.936                  |
| ARG        | 0.720                  | -1.322                  |
| SER        | 1.200                  | -1.978                  |
| THR        | 0.800                  | -0.416                  |
| VAL        | 0.240                  | 1.700                   |
| TRP        | 2.600                  | 2.004                   |
| TYR        | 1.600                  | 0.700                   |

**Table S5.** Folding assessment results obtained by I-TASSER for the 148 test set monomers.

| PDB ID | Sequence identity (%) | TM-score | RMSD (Å) |
|--------|-----------------------|----------|----------|
| 1AM2   | 28.2                  | 0.983    | 0.949    |
| 1AQB   | 29.7                  | 0.991    | 0.475    |
| 1BDO   | 33.8                  | 0.962    | 0.722    |
| 1BK7   | 32.1                  | 0.993    | 0.442    |
| 1C3D   | 37.1                  | 0.980    | 0.972    |
| 1CTF   | 38.2                  | 0.952    | 0.706    |
| 1EVS   | 28.8                  | 0.931    | 0.860    |
| 1EW4   | 29.2                  | 0.973    | 0.672    |
| 1IC6   | 42.3                  | 0.998    | 0.306    |
| 1KUH   | 37.9                  | 0.997    | 0.252    |
| 1LTU   | 26.5                  | 0.933    | 1.630    |
| 1MD6   | 34.4                  | 0.965    | 0.953    |
| 1NOA   | 40.7                  | 0.958    | 0.864    |
| 1NWA   | 39.5                  | 0.972    | 0.901    |
| 1OPD   | 41.2                  | 0.981    | 0.468    |
| 1OW1   | 32.9                  | 0.979    | 0.783    |
| 1P3C   | 36.7                  | 0.997    | 0.313    |
| 1PGV   | 25.7                  | 0.942    | 1.273    |
| 1PPN   | 33.5                  | 0.995    | 0.393    |
| 1PS4   | 34.4                  | 0.989    | 0.613    |
| 1QQP   | 30.3                  | 0.979    | 0.759    |
| 1R12   | 33.1                  | 0.994    | 0.470    |
| 1RLJ   | 34.8                  | 0.992    | 0.381    |
| 1RW    | 33.2                  | 0.987    | 0.701    |
| 1S7K   | 26.6                  | 0.880    | 1.410    |
| 1SEI   | 32.3                  | 0.962    | 0.930    |
| 1SMX   | 40.2                  | 0.889    | 1.586    |
| 1T0F   | 26.5                  | 0.999    | 0.160    |
| 1TC5   | 35.8                  | 0.998    | 0.226    |
| 1THV   | 37.2                  | 0.992    | 0.619    |
| 1UAI   | 36.8                  | 0.998    | 0.272    |
| 1UEB   | 38.0                  | 0.998    | 0.240    |
| 1V05   | 37.6                  | 0.973    | 0.594    |
| 1V30   | 32.1                  | 0.968    | 0.751    |
| 1V6T   | 40.2                  | 0.997    | 0.322    |
| 1V7Q   | 33.1                  | 0.964    | 1.001    |
| 1V8E   | 41.5                  | 0.989    | 0.592    |
| 1V8I   | 35.3                  | 0.905    | 2.263    |
| 1VIE   | 28.3                  | 0.942    | 0.881    |
| 1WV8   | 39.1                  | 0.941    | 0.726    |
| 1WVH   | 31.8                  | 0.932    | 1.389    |
| 1WY6   | 32.7                  | 0.996    | 0.302    |
| 1X1E   | 41.8                  | 0.992    | 0.550    |
| 1XDZ   | 24.4                  | 0.991    | 0.565    |
| 1XFS   | 24.8                  | 0.872    | 2.483    |
| 1XS5   | 41.7                  | 0.998    | 0.286    |
| 1YCK   | 26.9                  | 0.988    | 0.554    |
| 1YHH   | 33.2                  | 0.990    | 0.619    |
| 1YPF   | 35.3                  | 0.932    | 2.537    |

---

|      |      |       |       |
|------|------|-------|-------|
| 1YU5 | 28.4 | 0.929 | 1.338 |
| 1YW5 | 33.3 | 0.998 | 0.227 |
| 1YZX | 29.8 | 0.988 | 0.633 |
| 1Z0C | 42.5 | 0.958 | 1.202 |
| 1ZEQ | 31.2 | 0.961 | 0.682 |
| 1ZUH | 35.8 | 0.932 | 2.497 |
| 1ZZK | 33.8 | 0.851 | 2.856 |
| 2A8F | 27.6 | 0.978 | 0.547 |
| 2AHE | 33.3 | 0.961 | 1.258 |
| 2AVU | 24.4 | 0.996 | 0.285 |
| 2AYH | 35.5 | 0.989 | 0.635 |
| 2B0A | 35.5 | 0.998 | 0.230 |
| 2B2A | 25.2 | 0.957 | 2.357 |
| 2BK8 | 28.9 | 0.886 | 1.689 |
| 2BS2 | 28.5 | 0.994 | 0.459 |
| 2BV9 | 32.7 | 0.999 | 0.216 |
| 2CAY | 25.8 | 0.993 | 0.357 |
| 2CBA | 36.8 | 0.995 | 0.516 |
| 2CG7 | 35.6 | 0.966 | 0.652 |
| 2CWC | 41.2 | 0.993 | 0.677 |
| 2CWR | 39.2 | 0.948 | 1.118 |
| 2CWZ | 31.6 | 0.904 | 1.656 |
| 2CZS | 27.1 | 0.985 | 0.364 |
| 2D4P | 37.6 | 0.988 | 0.447 |
| 2DRI | 31.4 | 0.981 | 0.877 |
| 2E8F | 23.0 | 0.982 | 0.509 |
| 2E8G | 34.6 | 0.999 | 0.168 |
| 2FBQ | 29.1 | 0.999 | 0.201 |
| 2FI9 | 47.5 | 0.989 | 0.450 |
| 2FJZ | 25.4 | 0.906 | 0.955 |
| 2FL4 | 31.3 | 0.949 | 1.196 |
| 2FQ3 | 27.1 | 0.984 | 0.431 |
| 2FRG | 30.2 | 0.986 | 0.467 |
| 2G69 | 35.4 | 0.925 | 1.222 |
| 2G7S | 25.7 | 0.911 | 2.044 |
| 2H2R | 28.1 | 0.813 | 3.653 |
| 2H5N | 25.4 | 0.998 | 0.167 |
| 2HP7 | 25.1 | 0.972 | 0.985 |
| 2HU9 | 36.2 | 0.996 | 0.264 |
| 2I3F | 37.4 | 0.999 | 0.199 |
| 2I6V | 33.3 | 0.806 | 1.969 |
| 2IBL | 26.9 | 0.684 | 3.288 |
| 2IIA | 31.5 | 0.970 | 1.216 |
| 2IL5 | 22.8 | 0.781 | 2.750 |
| 2J6A | 34.6 | 0.996 | 0.268 |
| 2NS9 | 30.4 | 0.985 | 0.574 |
| 2OEB | 31.6 | 0.993 | 0.375 |
| 2OFC | 25.5 | 0.996 | 0.291 |
| 2OHW | 35.9 | 0.995 | 0.292 |
| 2OL7 | 32.8 | 0.896 | 2.080 |
| 2OSA | 28.1 | 0.980 | 0.867 |

---



---

|       |      |       |       |
|-------|------|-------|-------|
| 2OVO  | 32.1 | 0.720 | 2.030 |
| 2P5D  | 27.6 | 0.969 | 0.936 |
| 2PBP  | 31.8 | 0.939 | 1.925 |
| 2PET  | 31.2 | 0.997 | 0.316 |
| 2PMR  | 25.0 | 0.992 | 0.273 |
| 2PND  | 31.1 | 0.973 | 0.706 |
| 2PTV  | 41.7 | 0.908 | 1.518 |
| 2Q7A  | 28.3 | 0.998 | 0.230 |
| 2QHK  | 36.1 | 0.867 | 2.010 |
| 2QKH  | 21.3 | 0.883 | 2.009 |
| 2QQ4  | 37.7 | 0.996 | 0.291 |
| 2QR3  | 37.2 | 0.890 | 1.714 |
| 2QSI  | 34.6 | 0.955 | 0.847 |
| 2QV5  | 38.2 | 0.998 | 0.278 |
| 2RIK  | 31.7 | 0.854 | 2.723 |
| 2TGI  | 27.7 | 0.956 | 0.943 |
| 2VC8  | 31.9 | 0.976 | 0.543 |
| 2VQ2  | 32.3 | 0.973 | 1.057 |
| 2W2U  | 24.0 | 0.951 | 0.942 |
| 2YXF  | 30.3 | 0.869 | 3.048 |
| 2Z37  | 34.8 | 0.994 | 0.451 |
| 3B7H  | 22.4 | 0.847 | 2.233 |
| 3BN6  | 34.2 | 0.986 | 0.579 |
| 3DEE  | 22.2 | 0.939 | 1.508 |
| 3E35  | 36.1 | 0.963 | 1.514 |
| 3FNI  | 30.1 | 0.916 | 1.719 |
| 3FYB  | 25.0 | 0.933 | 1.145 |
| 3GK6  | 28.2 | 0.976 | 0.791 |
| 3H0D  | 27.2 | 0.873 | 2.195 |
| 3HWP  | 30.8 | 0.959 | 1.429 |
| 3IR4A | 34.1 | 0.969 | 1.070 |
| 3KNV  | 30.9 | 0.996 | 0.270 |
| 3M7O  | 35.0 | 0.933 | 1.353 |
| 3MQZ  | 32.3 | 0.989 | 0.586 |
| 3NRW  | 31.4 | 0.987 | 0.457 |
| 3NUL  | 36.2 | 0.896 | 1.693 |
| 3PFG  | 36.1 | 0.986 | 0.789 |
| 3PO0  | 31.0 | 0.988 | 0.373 |
| 3RHT  | 33.3 | 0.983 | 0.809 |
| 3RJT  | 29.8 | 0.917 | 1.877 |
| 3RKV  | 23.8 | 0.979 | 0.666 |
| 3RMQ  | 30.8 | 0.993 | 0.331 |
| 3RNV  | 29.3 | 0.997 | 0.213 |
| 3RPC  | 26.6 | 0.949 | 1.496 |
| 3RPE  | 30.3 | 0.997 | 0.282 |
| 3RTL  | 28.1 | 0.990 | 0.407 |
| 3VUB  | 33.7 | 0.990 | 0.366 |
| 4PTI  | 24.1 | 0.929 | 0.995 |

---

**Table S6.** 29 X-ray/NMR structure pairs used for protein sequence design.

| PDB ID |      | X-ray resolution(Å) | Number of NMR structures | Number of residues | Sequence identity (%) of the designed sequence based on X-ray structure to the native Sequence |
|--------|------|---------------------|--------------------------|--------------------|------------------------------------------------------------------------------------------------|
| X-ray  | NMR  |                     |                          |                    |                                                                                                |
| 1AGI   | 1GIO | 1.5                 | 10                       | 125                | 27.2                                                                                           |
| 1BED   | 2IJY | 2.0                 | 22                       | 181                | 23.8                                                                                           |
| 1BP2   | 1BVM | 1.7                 | 20                       | 123                | 22.8                                                                                           |
| 1C44   | 1QND | 1.5                 | 20                       | 123                | 27.6                                                                                           |
| 1CHN   | 1DJM | 1.78                | 27                       | 126                | 36.5                                                                                           |
| 1EKG   | 1LY7 | 1.8                 | 15                       | 119                | 31.9                                                                                           |
| 1FKJ   | 1FKR | 1.7                 | 20                       | 102                | 44.9                                                                                           |
| 1GNU   | 1KOT | 1.75                | 15                       | 117                | 37.6                                                                                           |
| 1GPR   | 1AX3 | 1.9                 | 16                       | 158                | 41.1                                                                                           |
| 1GSV   | 3PHY | 1.75                | 26                       | 122                | 32.0                                                                                           |
| 1HCV   | 1G9E | 1.85                | 20                       | 116                | 34.5                                                                                           |
| 1IFB   | 1AEL | 1.96                | 20                       | 131                | 26.7                                                                                           |
| 1IFR   | 1IVT | 1.4                 | 15                       | 111                | 31.0                                                                                           |
| 1J2A   | 1CLH | 1.8                 | 12                       | 159                | 34.9                                                                                           |
| 1JF4   | 1VRE | 1.4                 | 29                       | 140                | 32.0                                                                                           |
| 1KF5   | 2AAS | 1.15                | 32                       | 124                | 34.7                                                                                           |
| 1KM8   | 1BC4 | 1.9                 | 15                       | 105                | 29.1                                                                                           |
| 1LDS   | 1JNJ | 1.8                 | 20                       | 97                 | 25.8                                                                                           |
| 1MG4   | 1UF0 | 1.5                 | 20                       | 101                | 32.7                                                                                           |
| 1OPC   | 2JPB | 1.95                | 20                       | 99                 | 39.4                                                                                           |
| 1RRO   | 2NLN | 1.3                 | 20                       | 108                | 34.3                                                                                           |
| 1UOH   | 1TR4 | 2.0                 | 20                       | 223                | 39.5                                                                                           |
| 1WHO   | 1BMW | 1.9                 | 38                       | 89                 | 31.9                                                                                           |
| 1YV6   | 1PU3 | 1.78                | 20                       | 103                | 27.2                                                                                           |
| 2CWR   | 2CZN | 1.7                 | 38                       | 97                 | 30.9                                                                                           |
| 2E1F   | 2DGZ | 2.0                 | 20                       | 94                 | 33.0                                                                                           |
| 2GRC   | 2H60 | 1.5                 | 11                       | 105                | 30.6                                                                                           |
| 2SAK   | 1SSN | 1.8                 | 20                       | 121                | 29.8                                                                                           |
| 2V75   | 2JPS | 1.8                 | 45                       | 89                 | 32.6                                                                                           |

**Table S7.** Native sequence recapitulation results from designing 88 test set dimers using EvoEF2-mon. EvoEF2-mon is the EvoEF2 energy function that uses all of the EvoEF2 energy terms but with weights determined by designing monomer proteins (see main text).

| Residue              | EvoEF2-mon   |              |             |              |              | EvoEF2-mon (88 split monomers) |              |             |              |              |
|----------------------|--------------|--------------|-------------|--------------|--------------|--------------------------------|--------------|-------------|--------------|--------------|
|                      | #nat         | #des         | #id         | #id/#nat     | #id/#des     | #nat                           | #des         | #id         | #id/#nat     | #id/#des     |
| <i>All residues</i>  |              |              |             |              |              |                                |              |             |              |              |
| Ala                  | 1040         | 1311         | 381         | 0.366        | 0.291        | 1040                           | 1098         | 346         | 0.333        | 0.315        |
| Cys                  | 266          | 315          | 34          | 0.128        | 0.108        | 266                            | 229          | 40          | 0.150        | 0.175        |
| Asp                  | 786          | 702          | 186         | 0.237        | 0.265        | 786                            | 768          | 195         | 0.248        | 0.254        |
| Glu                  | 908          | 779          | 130         | 0.143        | 0.167        | 908                            | 939          | 129         | 0.142        | 0.137        |
| Phe                  | 549          | 575          | 198         | 0.361        | 0.344        | 549                            | 568          | 178         | 0.324        | 0.313        |
| Gly                  | 1014         | 1239         | 798         | 0.787        | 0.644        | 1014                           | 1128         | 770         | 0.759        | 0.683        |
| His                  | 331          | 416          | 47          | 0.142        | 0.113        | 331                            | 372          | 40          | 0.121        | 0.108        |
| Ile                  | 739          | 722          | 273         | 0.369        | 0.378        | 739                            | 679          | 270         | 0.365        | 0.398        |
| Lys                  | 799          | 630          | 107         | 0.134        | 0.170        | 799                            | 772          | 101         | 0.126        | 0.131        |
| Leu                  | 1242         | 1230         | 600         | 0.483        | 0.488        | 1242                           | 1169         | 595         | 0.479        | 0.509        |
| Met                  | 245          | 276          | 27          | 0.110        | 0.098        | 245                            | 231          | 28          | 0.114        | 0.121        |
| Asn                  | 599          | 602          | 104         | 0.174        | 0.173        | 599                            | 622          | 100         | 0.167        | 0.161        |
| Pro                  | 709          | 626          | 299         | 0.422        | 0.478        | 709                            | 700          | 335         | 0.472        | 0.479        |
| Gln                  | 570          | 543          | 50          | 0.088        | 0.092        | 570                            | 500          | 39          | 0.068        | 0.078        |
| Arg                  | 651          | 576          | 92          | 0.141        | 0.160        | 651                            | 738          | 99          | 0.152        | 0.134        |
| Ser                  | 822          | 781          | 154         | 0.187        | 0.197        | 822                            | 847          | 164         | 0.200        | 0.194        |
| Thr                  | 792          | 702          | 169         | 0.213        | 0.241        | 792                            | 722          | 146         | 0.184        | 0.202        |
| Val                  | 978          | 1084         | 412         | 0.421        | 0.380        | 978                            | 949          | 383         | 0.392        | 0.404        |
| Trp                  | 203          | 185          | 31          | 0.153        | 0.168        | 203                            | 213          | 28          | 0.138        | 0.131        |
| Tyr                  | 495          | 444          | 97          | 0.196        | 0.218        | 495                            | 494          | 93          | 0.188        | 0.188        |
| <b>Total</b>         | <b>13738</b> | <b>13738</b> | <b>4189</b> | <b>0.305</b> | <b>0.305</b> | <b>13738</b>                   | <b>13738</b> | <b>4079</b> | <b>0.297</b> | <b>0.297</b> |
| <i>Core residues</i> |              |              |             |              |              |                                |              |             |              |              |
| Ala                  | 348          | 416          | 181         | 0.520        | 0.435        | 348                            | 404          | 198         | 0.569        | 0.490        |
| Cys                  | 132          | 136          | 22          | 0.167        | 0.162        | 132                            | 127          | 30          | 0.227        | 0.236        |
| Asp                  | 70           | 72           | 19          | 0.271        | 0.264        | 70                             | 75           | 29          | 0.414        | 0.387        |
| Glu                  | 45           | 101          | 5           | 0.111        | 0.050        | 45                             | 100          | 10          | 0.222        | 0.100        |
| Phe                  | 218          | 170          | 92          | 0.422        | 0.541        | 218                            | 184          | 93          | 0.427        | 0.505        |
| Gly                  | 200          | 194          | 151         | 0.755        | 0.778        | 200                            | 178          | 148         | 0.740        | 0.831        |
| His                  | 63           | 72           | 11          | 0.175        | 0.153        | 63                             | 63           | 12          | 0.190        | 0.190        |
| Ile                  | 322          | 330          | 153         | 0.475        | 0.464        | 322                            | 349          | 169         | 0.525        | 0.484        |
| Lys                  | 49           | 57           | 9           | 0.184        | 0.158        | 49                             | 58           | 10          | 0.204        | 0.172        |
| Leu                  | 501          | 506          | 295         | 0.589        | 0.583        | 501                            | 550          | 335         | 0.669        | 0.609        |
| Met                  | 82           | 105          | 9           | 0.110        | 0.086        | 82                             | 120          | 16          | 0.195        | 0.133        |
| Asn                  | 73           | 41           | 15          | 0.205        | 0.366        | 73                             | 39           | 19          | 0.260        | 0.487        |

|              |             |             |             |              |              |             |             |             |              |              |
|--------------|-------------|-------------|-------------|--------------|--------------|-------------|-------------|-------------|--------------|--------------|
| Pro          | 102         | 83          | 52          | 0.510        | 0.627        | 102         | 93          | 59          | 0.578        | 0.634        |
| Gln          | 38          | 39          | 3           | 0.079        | 0.077        | 38          | 44          | 2           | 0.053        | 0.045        |
| Arg          | 58          | 37          | 10          | 0.172        | 0.270        | 58          | 51          | 14          | 0.241        | 0.275        |
| Ser          | 140         | 72          | 18          | 0.129        | 0.250        | 140         | 67          | 26          | 0.186        | 0.388        |
| Thr          | 134         | 163         | 43          | 0.321        | 0.264        | 134         | 130         | 38          | 0.284        | 0.292        |
| Val          | 413         | 498         | 223         | 0.540        | 0.448        | 413         | 454         | 232         | 0.562        | 0.511        |
| Trp          | 73          | 48          | 13          | 0.178        | 0.271        | 73          | 40          | 10          | 0.137        | 0.250        |
| Tyr          | 161         | 82          | 29          | 0.180        | 0.354        | 161         | 96          | 26          | 0.161        | 0.271        |
| <b>Total</b> | <b>3222</b> | <b>3222</b> | <b>1353</b> | <b>0.420</b> | <b>0.420</b> | <b>3222</b> | <b>3222</b> | <b>1476</b> | <b>0.458</b> | <b>0.458</b> |

*Surface residues*

|              |             |             |            |              |              |             |             |            |              |              |
|--------------|-------------|-------------|------------|--------------|--------------|-------------|-------------|------------|--------------|--------------|
| Ala          | 281         | 296         | 44         | 0.157        | 0.149        | 281         | 238         | 19         | 0.068        | 0.080        |
| Cys          | 26          | 31          | 1          | 0.038        | 0.032        | 26          | 18          | 1          | 0.038        | 0.056        |
| Asp          | 369         | 305         | 75         | 0.203        | 0.246        | 369         | 327         | 79         | 0.214        | 0.242        |
| Glu          | 477         | 282         | 53         | 0.111        | 0.188        | 477         | 339         | 58         | 0.122        | 0.171        |
| Phe          | 53          | 100         | 9          | 0.170        | 0.090        | 53          | 90          | 10         | 0.189        | 0.111        |
| Gly          | 345         | 517         | 284        | 0.823        | 0.549        | 345         | 469         | 288        | 0.835        | 0.614        |
| His          | 82          | 120         | 6          | 0.073        | 0.050        | 82          | 116         | 5          | 0.061        | 0.043        |
| Ile          | 76          | 50          | 4          | 0.053        | 0.080        | 76          | 35          | 0          | 0.000        | 0.000        |
| Lys          | 368         | 238         | 36         | 0.098        | 0.151        | 368         | 293         | 40         | 0.109        | 0.137        |
| Leu          | 138         | 117         | 24         | 0.174        | 0.205        | 138         | 99          | 24         | 0.174        | 0.242        |
| Met          | 39          | 21          | 0          | 0.000        | 0.000        | 39          | 14          | 1          | 0.026        | 0.071        |
| Asn          | 229         | 323         | 37         | 0.162        | 0.115        | 229         | 325         | 29         | 0.127        | 0.089        |
| Pro          | 294         | 268         | 106        | 0.361        | 0.396        | 294         | 287         | 119        | 0.405        | 0.415        |
| Gln          | 250         | 234         | 17         | 0.068        | 0.073        | 250         | 211         | 15         | 0.060        | 0.071        |
| Arg          | 219         | 268         | 28         | 0.128        | 0.104        | 219         | 297         | 28         | 0.128        | 0.094        |
| Ser          | 360         | 431         | 72         | 0.200        | 0.167        | 360         | 430         | 76         | 0.211        | 0.177        |
| Thr          | 289         | 231         | 38         | 0.131        | 0.165        | 289         | 248         | 36         | 0.125        | 0.145        |
| Val          | 131         | 104         | 18         | 0.137        | 0.173        | 131         | 88          | 12         | 0.092        | 0.136        |
| Trp          | 17          | 44          | 3          | 0.176        | 0.068        | 17          | 52          | 2          | 0.118        | 0.038        |
| Tyr          | 55          | 118         | 6          | 0.109        | 0.051        | 55          | 122         | 7          | 0.127        | 0.057        |
| <b>Total</b> | <b>4098</b> | <b>4098</b> | <b>861</b> | <b>0.210</b> | <b>0.210</b> | <b>4098</b> | <b>4098</b> | <b>849</b> | <b>0.207</b> | <b>0.207</b> |

*Interface residues*

|     |     |     |     |       |       |     |     |     |       |       |
|-----|-----|-----|-----|-------|-------|-----|-----|-----|-------|-------|
| Ala | 159 | 281 | 76  | 0.478 | 0.270 | 159 | 175 | 35  | 0.220 | 0.200 |
| Cys | 45  | 83  | 7   | 0.156 | 0.084 | 45  | 31  | 3   | 0.067 | 0.097 |
| Asp | 174 | 137 | 45  | 0.259 | 0.328 | 174 | 178 | 39  | 0.224 | 0.219 |
| Glu | 181 | 163 | 40  | 0.221 | 0.245 | 181 | 215 | 18  | 0.099 | 0.084 |
| Phe | 133 | 133 | 41  | 0.308 | 0.308 | 133 | 113 | 22  | 0.165 | 0.195 |
| Gly | 182 | 263 | 149 | 0.819 | 0.567 | 182 | 229 | 121 | 0.665 | 0.528 |
| His | 92  | 105 | 13  | 0.141 | 0.124 | 92  | 79  | 11  | 0.120 | 0.139 |

|              |             |             |            |              |              |             |             |            |              |              |
|--------------|-------------|-------------|------------|--------------|--------------|-------------|-------------|------------|--------------|--------------|
| Ile          | 138         | 148         | 50         | 0.362        | 0.338        | 138         | 91          | 34         | 0.246        | 0.374        |
| Lys          | 130         | 115         | 21         | 0.162        | 0.183        | 130         | 195         | 16         | 0.123        | 0.082        |
| Leu          | 222         | 231         | 107        | 0.482        | 0.463        | 222         | 155         | 63         | 0.284        | 0.406        |
| Met          | 53          | 75          | 10         | 0.189        | 0.133        | 53          | 24          | 5          | 0.094        | 0.208        |
| Asn          | 140         | 123         | 26         | 0.186        | 0.211        | 140         | 158         | 27         | 0.193        | 0.171        |
| Pro          | 151         | 127         | 64         | 0.424        | 0.504        | 151         | 154         | 64         | 0.424        | 0.416        |
| Gln          | 123         | 102         | 15         | 0.122        | 0.147        | 123         | 126         | 8          | 0.065        | 0.063        |
| Arg          | 167         | 88          | 24         | 0.144        | 0.273        | 167         | 168         | 15         | 0.090        | 0.089        |
| Ser          | 136         | 122         | 24         | 0.176        | 0.197        | 136         | 202         | 23         | 0.169        | 0.114        |
| Thr          | 152         | 137         | 41         | 0.270        | 0.299        | 152         | 139         | 23         | 0.151        | 0.165        |
| Val          | 170         | 201         | 72         | 0.424        | 0.358        | 170         | 140         | 45         | 0.265        | 0.321        |
| Trp          | 60          | 46          | 11         | 0.183        | 0.239        | 60          | 66          | 11         | 0.183        | 0.167        |
| Tyr          | 150         | 78          | 25         | 0.167        | 0.321        | 150         | 120         | 30         | 0.200        | 0.250        |
| <b>Total</b> | <b>2758</b> | <b>2758</b> | <b>861</b> | <b>0.312</b> | <b>0.312</b> | <b>2758</b> | <b>2758</b> | <b>613</b> | <b>0.222</b> | <b>0.222</b> |

---

**Table S8.** Native sequence recapitulation results from designing 88 test set dimers using EvoEF and the final optimized EvoEF2 energy function.

| Residue              | EvoEF        |              |             |              |              | EvoEF2       |              |             |              |              |
|----------------------|--------------|--------------|-------------|--------------|--------------|--------------|--------------|-------------|--------------|--------------|
|                      | #nat         | #des         | #id         | #id/#nat     | #id/#des     | #nat         | #des         | #id         | #id/#nat     | #id/#des     |
| <i>All residues</i>  |              |              |             |              |              |              |              |             |              |              |
| Ala                  | 1040         | 821          | 206         | 0.198        | 0.251        | 1040         | 1333         | 388         | 0.373        | 0.291        |
| Cys                  | 266          | 791          | 31          | 0.117        | 0.039        | 266          | 328          | 31          | 0.117        | 0.095        |
| Asp                  | 786          | 1173         | 110         | 0.140        | 0.094        | 786          | 693          | 184         | 0.234        | 0.266        |
| Glu                  | 908          | 924          | 88          | 0.097        | 0.095        | 908          | 785          | 127         | 0.140        | 0.162        |
| Phe                  | 549          | 230          | 59          | 0.107        | 0.257        | 549          | 565          | 182         | 0.332        | 0.322        |
| Gly                  | 1014         | 565          | 382         | 0.377        | 0.676        | 1014         | 1209         | 805         | 0.794        | 0.666        |
| His                  | 331          | 265          | 19          | 0.057        | 0.072        | 331          | 391          | 46          | 0.139        | 0.118        |
| Ile                  | 739          | 1951         | 214         | 0.290        | 0.110        | 739          | 764          | 284         | 0.384        | 0.372        |
| Lys                  | 799          | 141          | 17          | 0.021        | 0.121        | 799          | 665          | 122         | 0.153        | 0.183        |
| Leu                  | 1242         | 2116         | 330         | 0.266        | 0.156        | 1242         | 1191         | 589         | 0.474        | 0.495        |
| Met                  | 245          | 302          | 2           | 0.008        | 0.007        | 245          | 276          | 25          | 0.102        | 0.091        |
| Asn                  | 599          | 515          | 49          | 0.082        | 0.095        | 599          | 617          | 107         | 0.179        | 0.173        |
| Pro                  | 709          | 390          | 125         | 0.176        | 0.321        | 709          | 622          | 312         | 0.440        | 0.502        |
| Gln                  | 570          | 200          | 18          | 0.032        | 0.090        | 570          | 523          | 69          | 0.121        | 0.132        |
| Arg                  | 651          | 343          | 26          | 0.040        | 0.076        | 651          | 548          | 86          | 0.132        | 0.157        |
| Ser                  | 822          | 523          | 70          | 0.085        | 0.134        | 822          | 755          | 149         | 0.181        | 0.197        |
| Thr                  | 792          | 646          | 78          | 0.098        | 0.121        | 792          | 718          | 167         | 0.211        | 0.233        |
| Val                  | 978          | 1352         | 245         | 0.251        | 0.181        | 978          | 1110         | 427         | 0.437        | 0.385        |
| Trp                  | 203          | 99           | 13          | 0.064        | 0.131        | 203          | 190          | 28          | 0.138        | 0.147        |
| Tyr                  | 495          | 391          | 63          | 0.127        | 0.161        | 495          | 455          | 112         | 0.226        | 0.246        |
| <b>Total</b>         | <b>13738</b> | <b>13738</b> | <b>2145</b> | <b>0.156</b> | <b>0.156</b> | <b>13738</b> | <b>13738</b> | <b>4240</b> | <b>0.309</b> | <b>0.309</b> |
| <i>Core residues</i> |              |              |             |              |              |              |              |             |              |              |
| Ala                  | 348          | 323          | 107         | 0.307        | 0.331        | 348          | 446          | 192         | 0.552        | 0.430        |
| Cys                  | 132          | 225          | 13          | 0.098        | 0.058        | 132          | 138          | 19          | 0.144        | 0.138        |
| Asp                  | 70           | 367          | 20          | 0.286        | 0.054        | 70           | 78           | 21          | 0.300        | 0.269        |
| Glu                  | 45           | 229          | 6           | 0.133        | 0.026        | 45           | 93           | 8           | 0.178        | 0.086        |
| Phe                  | 218          | 59           | 26          | 0.119        | 0.441        | 218          | 171          | 80          | 0.367        | 0.468        |
| Gly                  | 200          | 185          | 126         | 0.630        | 0.681        | 200          | 179          | 147         | 0.735        | 0.821        |
| His                  | 63           | 76           | 7           | 0.111        | 0.092        | 63           | 63           | 8           | 0.127        | 0.127        |
| Ile                  | 322          | 333          | 103         | 0.320        | 0.309        | 322          | 362          | 161         | 0.500        | 0.445        |
| Lys                  | 49           | 11           | 1           | 0.020        | 0.091        | 49           | 51           | 12          | 0.245        | 0.235        |
| Leu                  | 501          | 321          | 122         | 0.244        | 0.380        | 501          | 500          | 296         | 0.591        | 0.592        |
| Met                  | 82           | 33           | 0           | 0.000        | 0.000        | 82           | 108          | 10          | 0.122        | 0.093        |
| Asn                  | 73           | 127          | 9           | 0.123        | 0.071        | 73           | 37           | 15          | 0.205        | 0.405        |

|              |             |             |            |              |              |             |             |             |              |              |
|--------------|-------------|-------------|------------|--------------|--------------|-------------|-------------|-------------|--------------|--------------|
| Pro          | 102         | 107         | 37         | 0.363        | 0.346        | 102         | 97          | 63          | 0.618        | 0.649        |
| Gln          | 38          | 38          | 2          | 0.053        | 0.053        | 38          | 39          | 2           | 0.053        | 0.051        |
| Arg          | 58          | 23          | 0          | 0.000        | 0.000        | 58          | 44          | 9           | 0.155        | 0.205        |
| Ser          | 140         | 171         | 16         | 0.114        | 0.094        | 140         | 68          | 18          | 0.129        | 0.265        |
| Thr          | 134         | 171         | 21         | 0.157        | 0.123        | 134         | 139         | 45          | 0.336        | 0.324        |
| Val          | 413         | 324         | 113        | 0.274        | 0.349        | 413         | 476         | 221         | 0.535        | 0.464        |
| Trp          | 73          | 24          | 8          | 0.110        | 0.333        | 73          | 43          | 11          | 0.151        | 0.256        |
| Tyr          | 161         | 75          | 23         | 0.143        | 0.307        | 161         | 90          | 28          | 0.174        | 0.311        |
| <b>Total</b> | <b>3222</b> | <b>3222</b> | <b>760</b> | <b>0.236</b> | <b>0.236</b> | <b>3222</b> | <b>3222</b> | <b>1366</b> | <b>0.424</b> | <b>0.424</b> |

*Surface residues*

|              |             |             |            |              |              |             |             |            |              |              |
|--------------|-------------|-------------|------------|--------------|--------------|-------------|-------------|------------|--------------|--------------|
| Ala          | 281         | 100         | 10         | 0.036        | 0.100        | 281         | 323         | 33         | 0.117        | 0.102        |
| Cys          | 26          | 198         | 2          | 0.077        | 0.010        | 26          | 40          | 1          | 0.038        | 0.025        |
| Asp          | 369         | 216         | 30         | 0.081        | 0.139        | 369         | 313         | 72         | 0.195        | 0.230        |
| Glu          | 477         | 211         | 29         | 0.061        | 0.137        | 477         | 233         | 45         | 0.094        | 0.193        |
| Phe          | 53          | 45          | 1          | 0.019        | 0.022        | 53          | 98          | 8          | 0.151        | 0.082        |
| Gly          | 345         | 69          | 50         | 0.145        | 0.725        | 345         | 508         | 290        | 0.841        | 0.571        |
| His          | 82          | 63          | 4          | 0.049        | 0.063        | 82          | 137         | 7          | 0.085        | 0.051        |
| Ile          | 76          | 819         | 13         | 0.171        | 0.016        | 76          | 46          | 2          | 0.026        | 0.043        |
| Lys          | 368         | 78          | 9          | 0.024        | 0.115        | 368         | 265         | 41         | 0.111        | 0.155        |
| Leu          | 138         | 900         | 32         | 0.232        | 0.036        | 138         | 95          | 24         | 0.174        | 0.253        |
| Met          | 39          | 133         | 0          | 0.000        | 0.000        | 39          | 22          | 2          | 0.051        | 0.091        |
| Asn          | 229         | 119         | 9          | 0.039        | 0.076        | 229         | 340         | 36         | 0.157        | 0.106        |
| Pro          | 294         | 79          | 22         | 0.075        | 0.278        | 294         | 271         | 111        | 0.378        | 0.410        |
| Gln          | 250         | 71          | 7          | 0.028        | 0.099        | 250         | 247         | 34         | 0.136        | 0.138        |
| Arg          | 219         | 180         | 12         | 0.055        | 0.067        | 219         | 229         | 27         | 0.123        | 0.118        |
| Ser          | 360         | 95          | 12         | 0.033        | 0.126        | 360         | 424         | 70         | 0.194        | 0.165        |
| Thr          | 289         | 171         | 20         | 0.069        | 0.117        | 289         | 252         | 44         | 0.152        | 0.175        |
| Val          | 131         | 426         | 18         | 0.137        | 0.042        | 131         | 112         | 21         | 0.160        | 0.188        |
| Trp          | 17          | 22          | 0          | 0.000        | 0.000        | 17          | 41          | 3          | 0.176        | 0.073        |
| Tyr          | 55          | 103         | 3          | 0.055        | 0.029        | 55          | 102         | 7          | 0.127        | 0.069        |
| <b>Total</b> | <b>4098</b> | <b>4098</b> | <b>283</b> | <b>0.069</b> | <b>0.069</b> | <b>4098</b> | <b>4098</b> | <b>878</b> | <b>0.214</b> | <b>0.214</b> |

*Interface residues*

|     |     |     |    |       |       |     |     |     |       |       |
|-----|-----|-----|----|-------|-------|-----|-----|-----|-------|-------|
| Ala | 159 | 191 | 50 | 0.314 | 0.262 | 159 | 257 | 73  | 0.459 | 0.284 |
| Cys | 45  | 175 | 8  | 0.178 | 0.046 | 45  | 60  | 5   | 0.111 | 0.083 |
| Asp | 174 | 271 | 35 | 0.201 | 0.129 | 174 | 157 | 46  | 0.264 | 0.293 |
| Glu | 181 | 202 | 27 | 0.149 | 0.134 | 181 | 192 | 37  | 0.204 | 0.193 |
| Phe | 133 | 51  | 14 | 0.105 | 0.275 | 133 | 121 | 39  | 0.293 | 0.322 |
| Gly | 182 | 151 | 88 | 0.484 | 0.583 | 182 | 245 | 150 | 0.824 | 0.612 |
| His | 92  | 58  | 3  | 0.033 | 0.052 | 92  | 83  | 16  | 0.174 | 0.193 |

|              |             |             |            |              |              |             |             |            |              |              |
|--------------|-------------|-------------|------------|--------------|--------------|-------------|-------------|------------|--------------|--------------|
| Ile          | 138         | 328         | 43         | 0.312        | 0.131        | 138         | 153         | 56         | 0.406        | 0.366        |
| Lys          | 130         | 19          | 2          | 0.015        | 0.105        | 130         | 128         | 23         | 0.177        | 0.180        |
| Leu          | 222         | 340         | 70         | 0.315        | 0.206        | 222         | 246         | 104        | 0.468        | 0.423        |
| Met          | 53          | 56          | 2          | 0.038        | 0.036        | 53          | 71          | 6          | 0.113        | 0.085        |
| Asn          | 140         | 123         | 15         | 0.107        | 0.122        | 140         | 104         | 28         | 0.200        | 0.269        |
| Pro          | 151         | 94          | 35         | 0.232        | 0.372        | 151         | 109         | 58         | 0.384        | 0.532        |
| Gln          | 123         | 37          | 5          | 0.041        | 0.135        | 123         | 91          | 13         | 0.106        | 0.143        |
| Arg          | 167         | 55          | 6          | 0.036        | 0.109        | 167         | 111         | 25         | 0.150        | 0.225        |
| Ser          | 136         | 133         | 26         | 0.191        | 0.195        | 136         | 133         | 30         | 0.221        | 0.226        |
| Thr          | 152         | 129         | 16         | 0.105        | 0.124        | 152         | 125         | 31         | 0.204        | 0.248        |
| Val          | 170         | 242         | 47         | 0.276        | 0.194        | 170         | 222         | 76         | 0.447        | 0.342        |
| Trp          | 60          | 20          | 2          | 0.033        | 0.100        | 60          | 44          | 10         | 0.167        | 0.227        |
| Tyr          | 150         | 83          | 18         | 0.120        | 0.217        | 150         | 106         | 36         | 0.240        | 0.340        |
| <b>Total</b> | <b>2758</b> | <b>2758</b> | <b>512</b> | <b>0.186</b> | <b>0.186</b> | <b>2758</b> | <b>2758</b> | <b>862</b> | <b>0.313</b> | <b>0.313</b> |

---



**Table S9.** Native sequence recapitulation results from designing 132 test set dimers using EvoEF and the final optimized EvoEF2 energy function.

| Residue              | EvoEF        |              |             |              |              | EvoEF2       |              |             |              |              |
|----------------------|--------------|--------------|-------------|--------------|--------------|--------------|--------------|-------------|--------------|--------------|
|                      | #nat         | #des         | #id         | #id/#nat     | #id/#des     | #nat         | #des         | #id         | #id/#nat     | #id/#des     |
| <i>All residues</i>  |              |              |             |              |              |              |              |             |              |              |
| Ala                  | 1728         | 1320         | 365         | 0.211        | 0.277        | 1728         | 2251         | 685         | 0.396        | 0.304        |
| Cys                  | 382          | 1334         | 44          | 0.115        | 0.033        | 382          | 549          | 56          | 0.147        | 0.102        |
| Asp                  | 1232         | 1667         | 175         | 0.142        | 0.105        | 1232         | 999          | 296         | 0.240        | 0.296        |
| Glu                  | 1513         | 1437         | 147         | 0.097        | 0.102        | 1513         | 1176         | 232         | 0.153        | 0.197        |
| Phe                  | 820          | 342          | 70          | 0.085        | 0.205        | 820          | 812          | 256         | 0.312        | 0.315        |
| Gly                  | 1549         | 858          | 601         | 0.388        | 0.700        | 1549         | 1704         | 1129        | 0.729        | 0.663        |
| His                  | 467          | 366          | 23          | 0.049        | 0.063        | 467          | 540          | 62          | 0.133        | 0.115        |
| Ile                  | 1222         | 3026         | 362         | 0.296        | 0.120        | 1222         | 1319         | 487         | 0.399        | 0.369        |
| Lys                  | 1330         | 244          | 37          | 0.028        | 0.152        | 1330         | 938          | 162         | 0.122        | 0.173        |
| Leu                  | 1967         | 3356         | 574         | 0.292        | 0.171        | 1967         | 2047         | 1015        | 0.516        | 0.496        |
| Met                  | 465          | 474          | 14          | 0.030        | 0.030        | 465          | 473          | 47          | 0.101        | 0.099        |
| Asn                  | 859          | 868          | 55          | 0.064        | 0.063        | 859          | 860          | 138         | 0.161        | 0.160        |
| Pro                  | 934          | 564          | 176         | 0.188        | 0.312        | 934          | 816          | 406         | 0.435        | 0.498        |
| Gln                  | 750          | 329          | 21          | 0.028        | 0.064        | 750          | 782          | 80          | 0.107        | 0.102        |
| Arg                  | 1008         | 463          | 48          | 0.048        | 0.104        | 1008         | 801          | 126         | 0.125        | 0.157        |
| Ser                  | 1164         | 790          | 107         | 0.092        | 0.135        | 1164         | 1148         | 204         | 0.175        | 0.178        |
| Thr                  | 1203         | 968          | 93          | 0.077        | 0.096        | 1203         | 1153         | 212         | 0.176        | 0.184        |
| Val                  | 1711         | 2026         | 433         | 0.253        | 0.214        | 1711         | 1873         | 778         | 0.455        | 0.415        |
| Trp                  | 239          | 133          | 12          | 0.050        | 0.090        | 239          | 289          | 45          | 0.188        | 0.156        |
| Tyr                  | 664          | 642          | 97          | 0.146        | 0.151        | 664          | 677          | 141         | 0.212        | 0.208        |
| <b>Total</b>         | <b>21207</b> | <b>21207</b> | <b>3454</b> | <b>0.163</b> | <b>0.163</b> | <b>21207</b> | <b>21207</b> | <b>6557</b> | <b>0.309</b> | <b>0.309</b> |
| <i>Core residues</i> |              |              |             |              |              |              |              |             |              |              |
| Ala                  | 595          | 530          | 178         | 0.299        | 0.336        | 595          | 797          | 361         | 0.607        | 0.453        |
| Cys                  | 198          | 440          | 30          | 0.152        | 0.068        | 198          | 255          | 32          | 0.162        | 0.125        |
| Asp                  | 122          | 558          | 37          | 0.303        | 0.066        | 122          | 116          | 38          | 0.311        | 0.328        |
| Glu                  | 101          | 345          | 19          | 0.188        | 0.055        | 101          | 140          | 21          | 0.208        | 0.150        |
| Phe                  | 296          | 88           | 24          | 0.081        | 0.273        | 296          | 220          | 104         | 0.351        | 0.473        |
| Gly                  | 381          | 303          | 209         | 0.549        | 0.690        | 381          | 293          | 246         | 0.646        | 0.840        |
| His                  | 82           | 100          | 7           | 0.085        | 0.070        | 82           | 74           | 14          | 0.171        | 0.189        |
| Ile                  | 543          | 533          | 145         | 0.267        | 0.272        | 543          | 627          | 263         | 0.484        | 0.419        |
| Lys                  | 79           | 12           | 1           | 0.013        | 0.083        | 79           | 100          | 13          | 0.165        | 0.130        |
| Leu                  | 784          | 524          | 216         | 0.276        | 0.412        | 784          | 813          | 483         | 0.616        | 0.594        |
| Met                  | 139          | 69           | 4           | 0.029        | 0.058        | 139          | 166          | 22          | 0.158        | 0.133        |
| Asn                  | 92           | 216          | 14          | 0.152        | 0.065        | 92           | 56           | 14          | 0.152        | 0.250        |

|              |             |             |             |              |              |             |             |             |              |              |
|--------------|-------------|-------------|-------------|--------------|--------------|-------------|-------------|-------------|--------------|--------------|
| Pro          | 138         | 153         | 41          | 0.297        | 0.268        | 138         | 114         | 74          | 0.536        | 0.649        |
| Gln          | 78          | 66          | 3           | 0.038        | 0.045        | 78          | 60          | 10          | 0.128        | 0.167        |
| Arg          | 86          | 22          | 2           | 0.023        | 0.091        | 86          | 45          | 8           | 0.093        | 0.178        |
| Ser          | 210         | 271         | 29          | 0.138        | 0.107        | 210         | 88          | 21          | 0.100        | 0.239        |
| Thr          | 253         | 257         | 24          | 0.095        | 0.093        | 253         | 220         | 58          | 0.229        | 0.264        |
| Val          | 777         | 605         | 219         | 0.282        | 0.362        | 777         | 869         | 445         | 0.573        | 0.512        |
| Trp          | 87          | 24          | 3           | 0.034        | 0.125        | 87          | 58          | 15          | 0.172        | 0.259        |
| Tyr          | 198         | 123         | 30          | 0.152        | 0.244        | 198         | 128         | 39          | 0.197        | 0.305        |
| <b>Total</b> | <b>5239</b> | <b>5239</b> | <b>1235</b> | <b>0.236</b> | <b>0.236</b> | <b>5239</b> | <b>5239</b> | <b>2281</b> | <b>0.435</b> | <b>0.435</b> |

*Surface residues*

|              |             |             |            |              |              |             |             |             |              |              |
|--------------|-------------|-------------|------------|--------------|--------------|-------------|-------------|-------------|--------------|--------------|
| Ala          | 459         | 162         | 24         | 0.052        | 0.148        | 459         | 524         | 58          | 0.126        | 0.111        |
| Cys          | 24          | 325         | 2          | 0.083        | 0.006        | 24          | 68          | 1           | 0.042        | 0.015        |
| Asp          | 587         | 288         | 43         | 0.073        | 0.149        | 587         | 439         | 118         | 0.201        | 0.269        |
| Glu          | 801         | 345         | 42         | 0.052        | 0.122        | 801         | 422         | 88          | 0.110        | 0.209        |
| Phe          | 67          | 66          | 0          | 0.000        | 0.000        | 67          | 154         | 10          | 0.149        | 0.065        |
| Gly          | 521         | 111         | 84         | 0.161        | 0.757        | 521         | 748         | 399         | 0.766        | 0.533        |
| His          | 119         | 84          | 4          | 0.034        | 0.048        | 119         | 185         | 7           | 0.059        | 0.038        |
| Ile          | 100         | 1212        | 35         | 0.350        | 0.029        | 100         | 78          | 17          | 0.170        | 0.218        |
| Lys          | 659         | 133         | 16         | 0.024        | 0.120        | 659         | 380         | 66          | 0.100        | 0.174        |
| Leu          | 214         | 1406        | 58         | 0.271        | 0.041        | 214         | 153         | 34          | 0.159        | 0.222        |
| Met          | 86          | 208         | 3          | 0.035        | 0.014        | 86          | 49          | 2           | 0.023        | 0.041        |
| Asn          | 387         | 238         | 12         | 0.031        | 0.050        | 387         | 508         | 68          | 0.176        | 0.134        |
| Pro          | 416         | 134         | 45         | 0.108        | 0.336        | 416         | 364         | 148         | 0.356        | 0.407        |
| Gln          | 311         | 98          | 5          | 0.016        | 0.051        | 311         | 376         | 29          | 0.093        | 0.077        |
| Arg          | 332         | 243         | 15         | 0.045        | 0.062        | 332         | 359         | 35          | 0.105        | 0.097        |
| Ser          | 465         | 137         | 12         | 0.026        | 0.088        | 465         | 635         | 94          | 0.202        | 0.148        |
| Thr          | 400         | 262         | 17         | 0.043        | 0.065        | 400         | 371         | 50          | 0.125        | 0.135        |
| Val          | 205         | 594         | 30         | 0.146        | 0.051        | 205         | 195         | 29          | 0.141        | 0.149        |
| Trp          | 25          | 29          | 1          | 0.040        | 0.034        | 25          | 67          | 4           | 0.160        | 0.060        |
| Tyr          | 77          | 180         | 8          | 0.104        | 0.044        | 77          | 180         | 15          | 0.195        | 0.083        |
| <b>Total</b> | <b>6255</b> | <b>6255</b> | <b>456</b> | <b>0.073</b> | <b>0.073</b> | <b>6255</b> | <b>6255</b> | <b>1272</b> | <b>0.203</b> | <b>0.203</b> |

*Interface residues*

|     |     |     |     |       |       |     |     |     |       |       |
|-----|-----|-----|-----|-------|-------|-----|-----|-----|-------|-------|
| Ala | 278 | 321 | 86  | 0.309 | 0.268 | 278 | 405 | 123 | 0.442 | 0.304 |
| Cys | 55  | 237 | 6   | 0.109 | 0.025 | 55  | 114 | 10  | 0.182 | 0.088 |
| Asp | 251 | 350 | 48  | 0.191 | 0.137 | 251 | 199 | 65  | 0.259 | 0.327 |
| Glu | 258 | 333 | 41  | 0.159 | 0.123 | 258 | 248 | 52  | 0.202 | 0.210 |
| Phe | 212 | 91  | 32  | 0.151 | 0.352 | 212 | 196 | 70  | 0.330 | 0.357 |
| Gly | 258 | 241 | 152 | 0.589 | 0.631 | 258 | 316 | 201 | 0.779 | 0.636 |
| His | 135 | 85  | 6   | 0.044 | 0.071 | 135 | 131 | 23  | 0.170 | 0.176 |

|              |             |             |            |              |              |             |             |             |              |              |
|--------------|-------------|-------------|------------|--------------|--------------|-------------|-------------|-------------|--------------|--------------|
| Ile          | 218         | 504         | 68         | 0.312        | 0.135        | 218         | 246         | 86          | 0.394        | 0.350        |
| Lys          | 247         | 38          | 6          | 0.024        | 0.158        | 247         | 177         | 39          | 0.158        | 0.220        |
| Leu          | 389         | 602         | 132        | 0.339        | 0.219        | 389         | 458         | 215         | 0.553        | 0.469        |
| Met          | 114         | 81          | 5          | 0.044        | 0.062        | 114         | 134         | 13          | 0.114        | 0.097        |
| Asn          | 168         | 186         | 14         | 0.083        | 0.075        | 168         | 131         | 24          | 0.143        | 0.183        |
| Pro          | 186         | 125         | 46         | 0.247        | 0.368        | 186         | 181         | 97          | 0.522        | 0.536        |
| Gln          | 163         | 55          | 5          | 0.031        | 0.091        | 163         | 131         | 23          | 0.141        | 0.176        |
| Arg          | 273         | 68          | 15         | 0.055        | 0.221        | 273         | 144         | 35          | 0.128        | 0.243        |
| Ser          | 206         | 183         | 38         | 0.184        | 0.208        | 206         | 201         | 37          | 0.180        | 0.184        |
| Thr          | 252         | 214         | 32         | 0.127        | 0.150        | 252         | 245         | 53          | 0.210        | 0.216        |
| Val          | 304         | 350         | 81         | 0.266        | 0.231        | 304         | 343         | 144         | 0.474        | 0.420        |
| Trp          | 69          | 31          | 4          | 0.058        | 0.129        | 69          | 69          | 13          | 0.188        | 0.188        |
| Tyr          | 181         | 122         | 29         | 0.160        | 0.238        | 181         | 148         | 38          | 0.210        | 0.257        |
| <b>Total</b> | <b>4217</b> | <b>4217</b> | <b>846</b> | <b>0.201</b> | <b>0.201</b> | <b>4217</b> | <b>4217</b> | <b>1361</b> | <b>0.323</b> | <b>0.323</b> |

---

### Supporting Figures

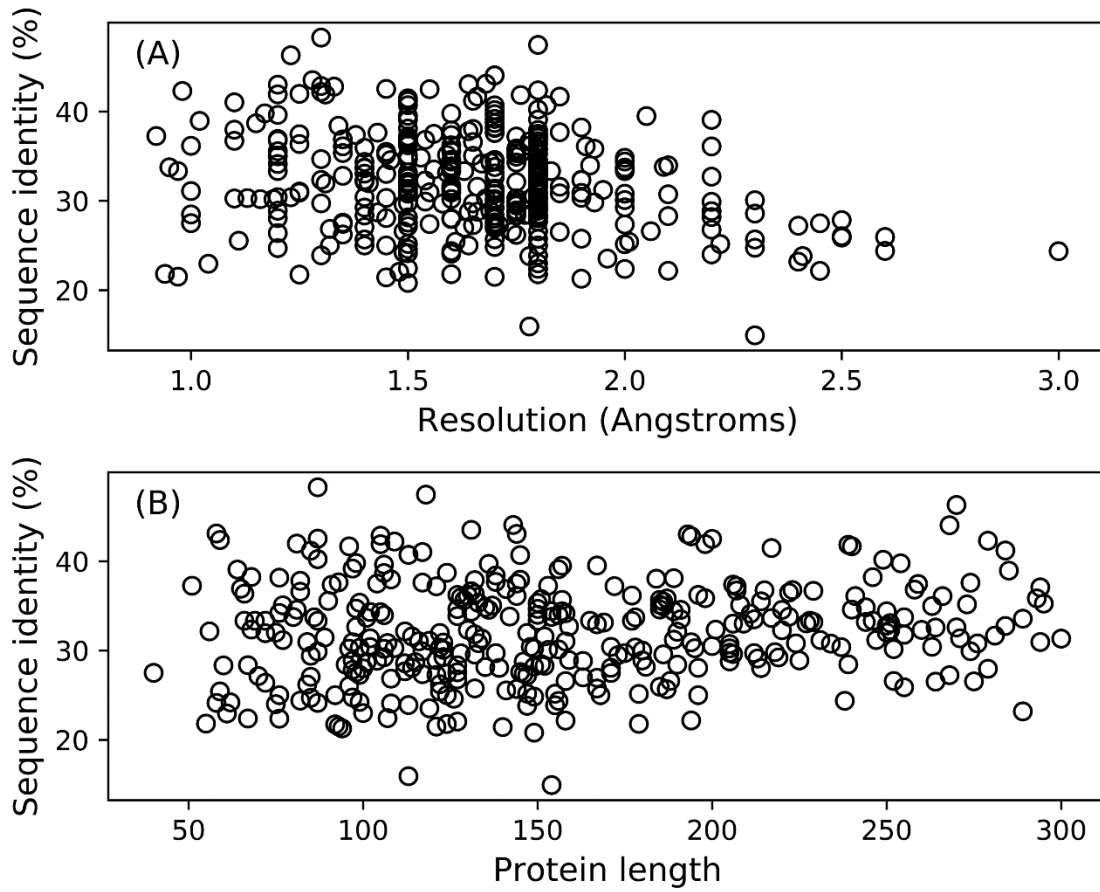

**Fig. S1.** Sequence identity between the native and designed sequences using EvoEF2 as a function of crystal structure resolution (A) and protein length (B).

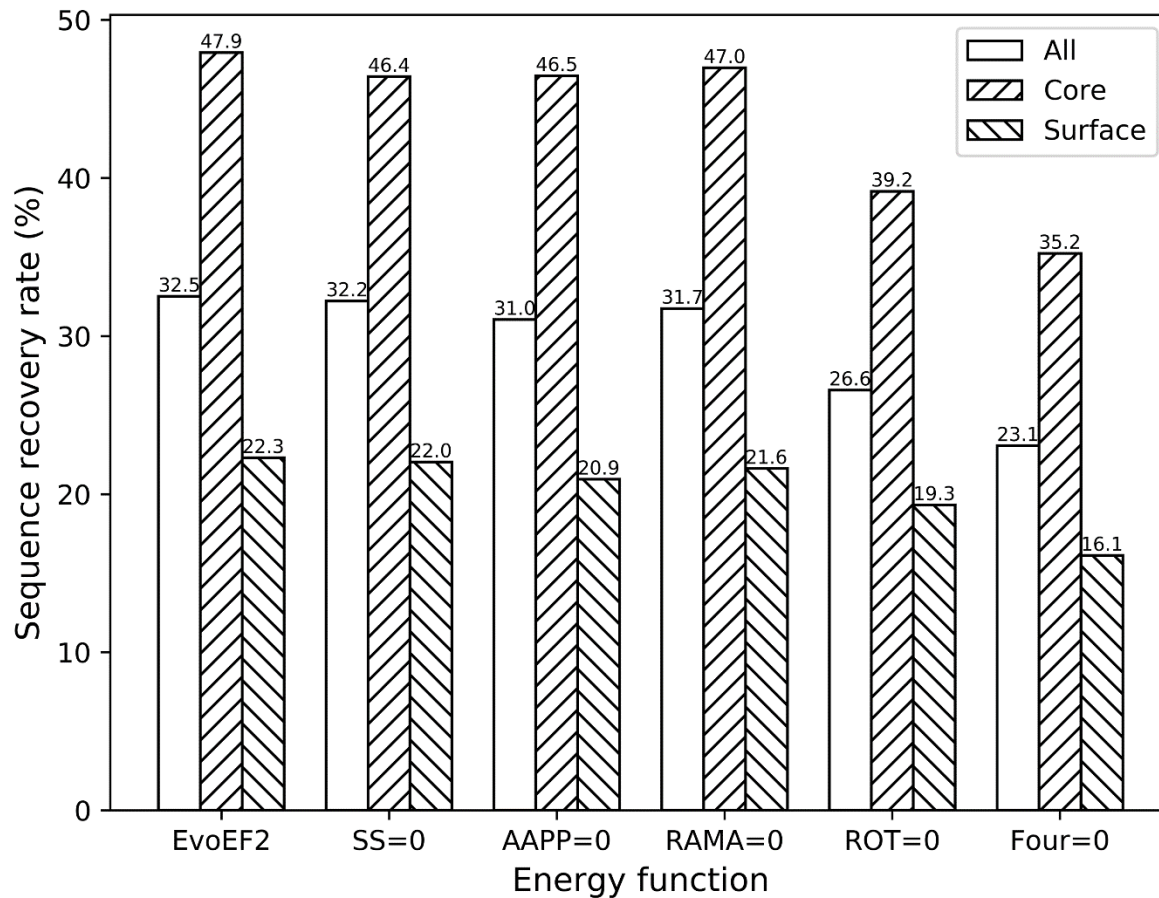

**Fig. S2.** Sequence recovery rates for the 148 test set monomers using different EvoEF2 energy functions. The columns marked with ‘EvoEF2’, ‘SS=0’, ‘AAPP=0’, ‘RAMA=0’, ‘ROT=0’ and ‘Four=0’ signify designs performed using the complete EvoEF2 energy function or disabling the disulfide bond term, amino acid propensity term, Ramachandran energy term, Dunbrack rotamer probability term, or each of the four new terms, respectively.

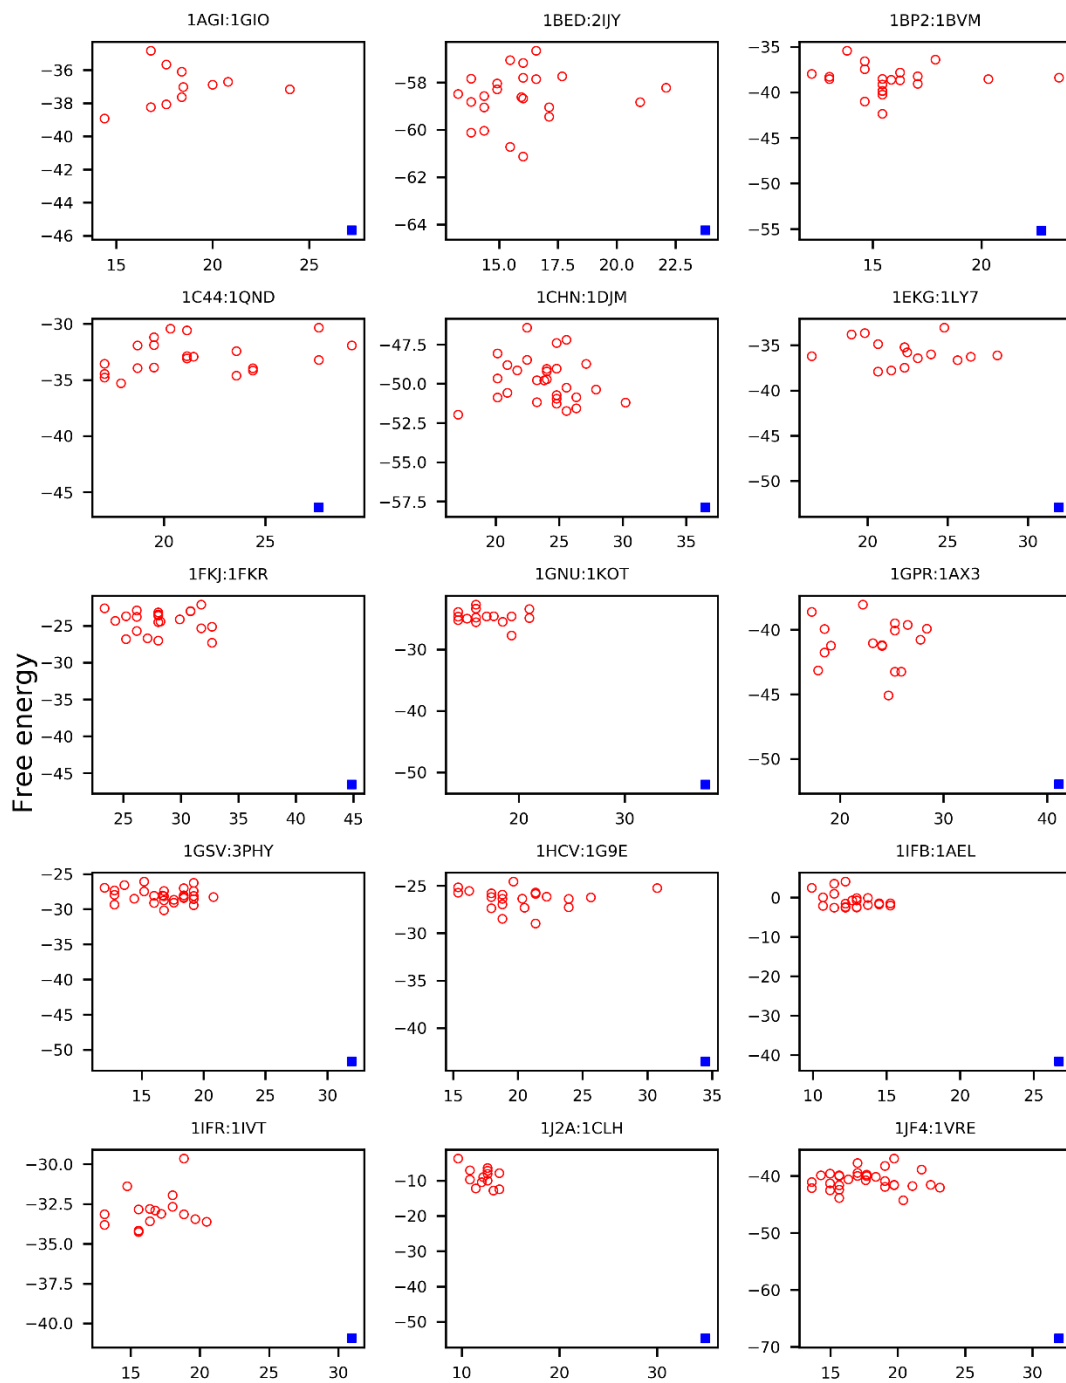

Sequence identity between the designed and native sequences (%)

**Fig. S3.** (continued on next page)

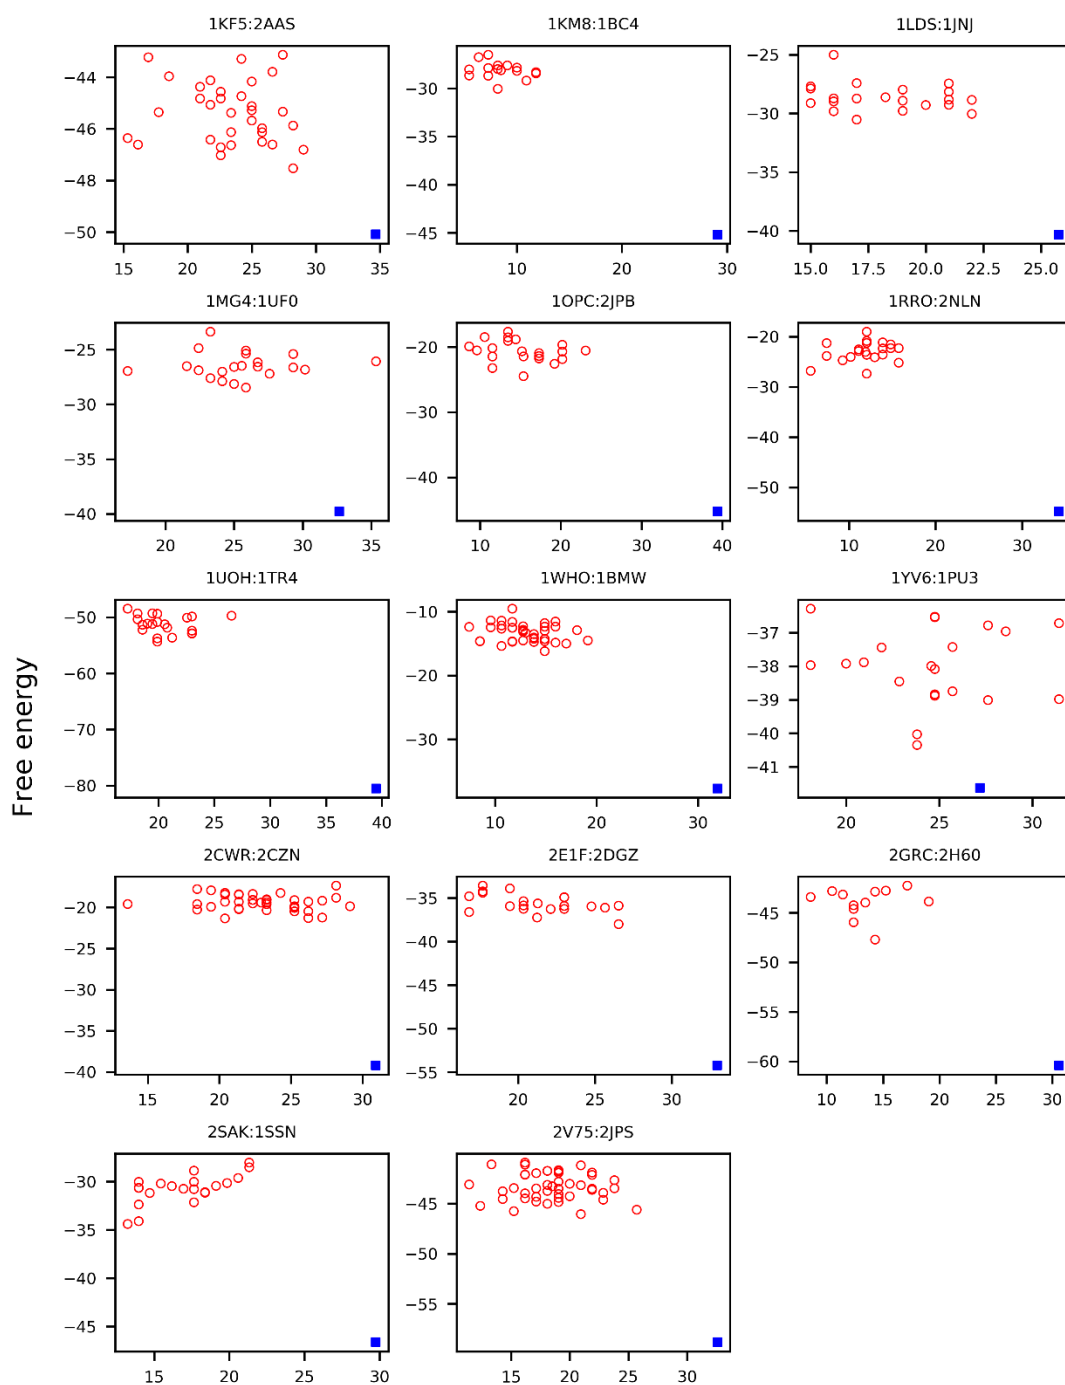

Sequence identity between the designed and native sequences (%)

**Fig. S3.** Sequence design for 29 X-ray/NMR structure pairs. The free energy (in EvoEF2 energy units) is plotted against the sequence identity (over all residues) between the designed and native sequences. In each subplot, the first PDB ID is the X-ray structure code and the second is the NMR PDB code. The results for the X-ray crystal structures are shown as filled blue squares, while the results for the NMR structures are shown as open red circles.

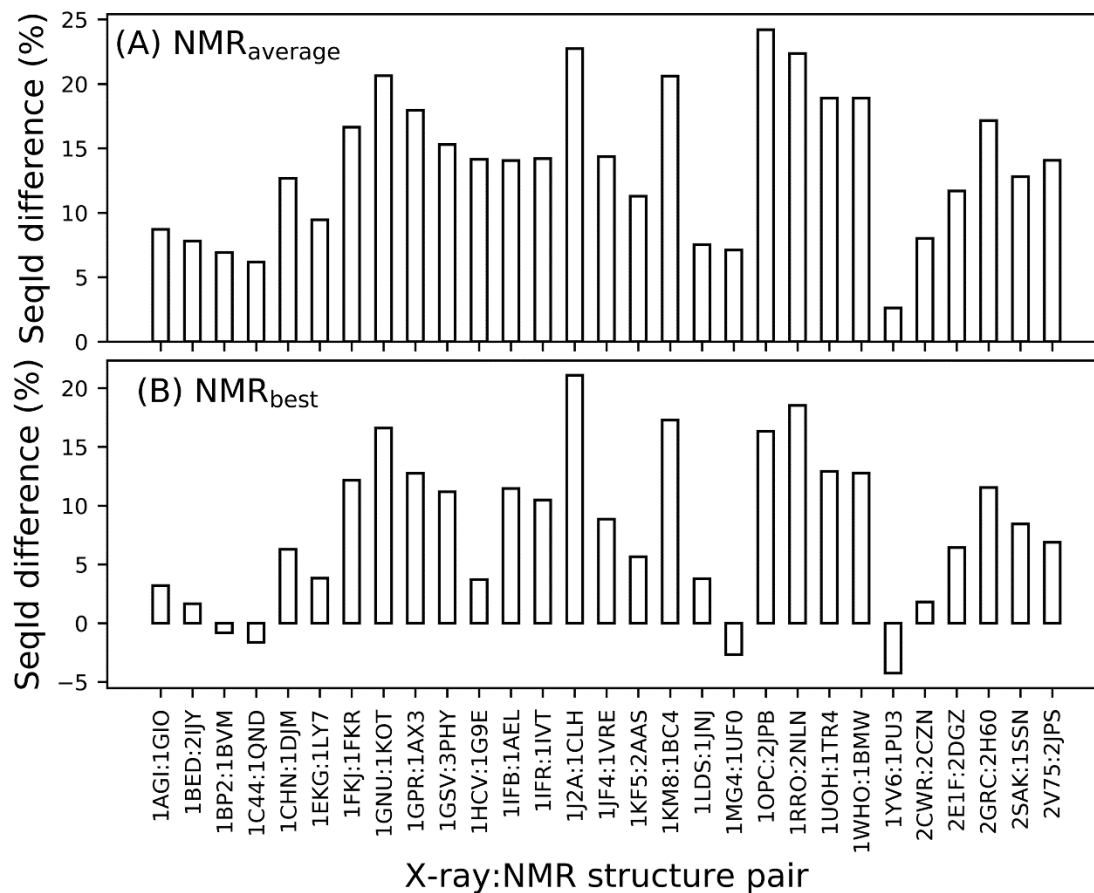

**Fig. S4.** Sequence design performance on X-ray and NMR templates using EvoEF2. The difference of sequence identity on the Y axis is calculated as  $SequenceIdentity_{(X-ray)} - SequenceIdentity_{(NMR)}$ . (A) Performance on the X-ray template is compared to the average performance over all NMR templates in the corresponding ensemble. (B) Performance on the X-ray template is compared to performance on the best performing NMR template.



## References

- Brooks, B.R., *et al.* (1983) CHARMM: A program for macromolecular energy, minimization, and dynamics calculations, *J. Comput. Chem.*, **4**, 187-217.
- Chen, V.B., *et al.* (2010) MolProbity: all-atom structure validation for macromolecular crystallography, *Acta Crystallogr. D Biol. Crystallogr.*, **66**, 12-21.
- Ding, F. and Dokholyan, N.V. (2006) Emergence of protein fold families through rational design, *PLoS Comput. Biol.*, **2**, e85.
- Guerois, R., Nielsen, J.E. and Serrano, L. (2002) Predicting Changes in the Stability of Proteins and Protein Complexes: A Study of More Than 1000 Mutations, *J. Mol. Biol.*, **320**, 369-387.
- Jankauskaite, J., *et al.* (2018) SKEMPI 2.0: An updated benchmark of changes in protein-protein binding energy, kinetics and thermodynamics upon mutation, *Bioinformatics*, **35**, 462-469.
- Jones, J.E. (1924) On the determination of molecular fields. I. From the variation of the viscosity of a gas with temperature, *Proc. R. Soc. Lond. A*, **106**, 441-462.
- Jones, J.E. (1924) On the determination of molecular fields. II. From the equation of state of a gas, *Proc. R. Soc. Lond. A*, **106**, 463-477.
- Kirkpatrick, S., Gelatt, C.D. and Vecchi, M.P. (1983) Optimization by simulated annealing, *Science*, **220**, 671-680.
- Kortemme, T., Morozov, A.V. and Baker, D. (2003) An Orientation-dependent Hydrogen Bonding Potential Improves Prediction of Specificity and Structure for Proteins and Protein-Protein Complexes, *J. Mol. Biol.*, **326**, 1239-1259.
- Krivov, G.G., Shapovalov, M.V. and Dunbrack, R.L., Jr. (2009) Improved prediction of protein side-chain conformations with SCWRL4, *Proteins*, **77**, 778-795.
- Kuhlman, B. and Baker, D. (2000) Native protein sequences are close to optimal for their structures, *Proc. Natl. Acad. Sci. U.S.A.*, **97**, 10383-10388.
- Lazaridis, T. and Karplus, M. (1999) Effective energy function for proteins in solution, *Proteins*, **35**, 133-152.
- Leaver-Fay, A., *et al.* (2013) Scientific benchmarks for guiding macromolecular energy function improvement, *Methods Enzymol.*, **523**, 109-143.
- Pearce, R., *et al.* (2019) EvoDesign: Designing protein-protein binding interactions using evolutionary interface profiles in conjunction with an optimized physical energy function, *J. Mol. Biol.*, **431**, 2467-2476.
- Quan, L., Lv, Q. and Zhang, Y. (2016) STRUM: structure-based prediction of protein stability changes upon single-point mutation, *Bioinformatics*, **32**, 2936-2946.
- Shapovalov, M.V. and Dunbrack, R.L., Jr. (2011) A smoothed backbone-dependent rotamer library for proteins derived from adaptive kernel density estimates and regressions, *Structure*, **19**, 844-858.
